# Supplementary material for: What are the Evolutionary Origins of Mitochondria? A Complex Network Approach
Source: PLoS One. 2015 Sep 2;10(9):e0134988. doi: 10.1371/journal.pone.0134988 (PMC4557972; doi:10.1371/journal.pone.0134988)
Supplement: S1 File — (XLS) [file pone.0134988.s001.xls]

## Sheet: ATP 4 and b
ATP 4 and b
Organism Name	Accession Number
1Spodoptera exigua	ACL77780
1Agrobacterium tumefaciens str. C58	NP_353741
1Bartonella quintana str. Toulouse	YP_032003
1Brucella melitensis bv. 1 str. 16M	NP_540461
1Candidatus Liberibacter solanacearum CLso-ZC1	YP_004062923
1Isoetes engelmannii	ADT62133
1Zea mays	ACZ65567
1Zea mays	ACZ65565
1Ajellomyces capsulatus G186AR	EEH10263
1Ajellomyces capsulatus H88	EGC44735
1Ajellomyces capsulatus NAm1	EDN06225
1Ajellomyces dermatitidis ATCC 18188	EGE84469
1Arthroderma gypseum CBS 118893	XP_003172567
1Arthroderma otae CBS 113480	EEQ34811
1Aspergillus niger CBS 513.88	XP_001398029
1Aspergillus oryzae RIB40	XP_001817648
1Metarhizium anisopliae ARSEF 23	EFZ00546
1Paracoccidioides brasiliensis Pb01	XP_002793309
1Paracoccidioides brasiliensis Pb03	EEH17617
1Paracoccidioides brasiliensis Pb18	EEH46480
1Saccharomyces cerevisiae	CAA34703
1Schizosaccharomyces japonicus yFS275	XP_002172101
1Trichophyton equinum CBS 127.97	EGE01064
1Uncinocarpus reesii 1704	XP_002542059
1Verticillium albo-atrum VaMs.102	XP_003005102
1Reclinomonas americana	NP_044805
1Acetobacter pomorum DM001	ZP_08242372
1Acidiphilium multivorum AIU301	BAJ79836
1Bombina orientalis	AAS02294
1Erythrobacter sp. NAP1	ZP_01039990
1Fulvimarina pelagi HTCC2506	ZP_01438196
1Glossina morsitans morsitans	ADD20224
1Gluconobacter oxydans 621H	AAW61909
1Oceanicaulis sp. HTCC2633	ZP_00957679
1Paulinella chromatophora	YP_002048863
1Roseobacter litoralis Och 149	YP_004692363
1Sphingobium chlorophenolicum L-1	YP_004552554
1Acidiphilium multivorum AIU301	BAJ79837
1Bartonella grahamii as4aup	YP_002971454
1Roseobacter litoralis Och 149	YP_004692364
1Xenopus (Silurana) tropicalis	NP_989118
1Xenopus laevis	NP_001079710
1Arabidopsis thaliana	AEK01300
1Arabidopsis thaliana	AEK01305
1Rhizanthella gardneri	ADO27640
1Rhizanthella gardneri	ADO27641
1Triticum aestivum	ACA62623
1Bambusa oldhamii	ABY55184
1Bartonella henselae str. Houston-1	YP_033252
1Bartonella tribocorum CIP 105476	YP_001609057
1Rhizobium leguminosarum bv. viciae 3841	YP_766539
1Roseobacter denitrificans OCh 114	YP_681653
1Agrobacterium sp. ATCC 31749	ZP_08526040
1Dinoroseobacter shibae DFL 12	YP_001534361
1Methylobacterium extorquens DM4	YP_003069442
1Paracoccus sp. TRP	ZP_08664245
1Rhodobacter sphaeroides ATCC 17025	YP_001166408
1Rhodobacter sphaeroides KD131	YP_002526790
1Rhodobacter sphaeroides WS8N	EGJ22537
1Rhodobacter sphaeroides WS8N	EGJ22536
1Rickettsia massiliae MTU5	YP_001498909
1Agrobacterium radiobacter K84	YP_002543573
1Agrobacterium tumefaciens F2	EGP59037
1Brucella ceti M13/05/1	ZP_05178412
1Brucella pinnipedialis B2/94	YP_004755492
1Brucella sp. 83/13	ZP_05180379
1Brucella sp. BO1	ZP_07477599
1Dinoroseobacter shibae DFL 12	YP_001534362
1Hoeflea phototrophica DFL-43	ZP_02168087
1Labrenzia aggregata IAM 12614	ZP_01548188
1Paracoccus sp. TRP	ZP_08664246
1Rhizobium etli CFN 42	YP_468404
1Rhizobium etli CIAT 652	YP_001977119
1Rhodobacter sphaeroides ATCC 17025	YP_001166407
1Rhodobacter sphaeroides KD131	YP_002526791
1Sinorhizobium fredii NGR234	YP_002824998
1Sinorhizobium meliloti 1021	NP_384943
1Sinorhizobium meliloti SM11	AEH77771
1Rhizobium etli 8C-3	ZP_03509479
1Rhizobium etli CIAT 894	ZP_03526965
1Candidatus Pelagibacter ubique HTCC1062	ATPF_PELUB
1Sphingopyxis alaskensis RB2256	ATPF_SPHAL
1Rhodobacter sphaeroides 2.4.1	ATPF_RHOS4
1Phenylobacterium zucineum HLK1	ATPF_PHEZH
1Erythrobacter litoralis HTCC2594	ATPF_ERYLH
1Magnetospirillum magneticum AMB-1	ATPF_MAGSA
1Paracoccus denitrificans PD1222	ATPF_PARDP
1Ruegeria sp. TM1040	ATPF_SILST
1Ruegeria pomeroyi DSS-3	ATPF_SILPO
1Roseobacter denitrificans OCh 114	ATPF_ROSDO
1Hyphomonas neptunium ATCC 15444	ATPF_HYPNA
1Sphingomonas wittichii RW1	ATPF_SPHWW
1Rickettsia typhi str. Wilmington	ATPF_RICTY
1Rickettsia prowazekii str. Madrid E	ATPF_RICPR
1Caulobacter sp. K31	ATPF_CAUSK
1Rhodospirillum rubrum	ATPF_RHORU
1Rhodobacter capsulatus	ATPF_RHOCA
1Rhodospirillum centenum SW	ATPX_RHOCS
1Rhodopseudomonas palustris TIE-1	ATPX_RHOPT
1Rhodopseudomonas palustris BisB5	ATPX_RHOPS
1Rhodopseudomonas palustris HaA2	ATPX_RHOP2
1Bradyrhizobium sp. ORS 278	ATPX_BRASO
1Rhodopseudomonas palustris BisA53	ATPX_RHOP5
1Rhodopseudomonas palustris BisB18	ATPX_RHOPB
1Bradyrhizobium sp. BTAi1	ATPX_BRASB
1Rhodobacter capsulatus	ATPX_RHOCA
1Brucella melitensis ATCC 23457	YP_002732157
1Candidatus Liberibacter asiaticus str. psy62	YP_003065499
1Candidatus Liberibacter asiaticus str. psy62	YP_003065498
1Candidatus Puniceispirillum marinum IMCC1322	YP_003551430
1Caulobacter crescentus NA1000	YP_002515745
1Chelativorans sp. BNC1	YP_673263
1Jannaschia sp. CCS1	YP_508711
1Jannaschia sp. CCS1	YP_508712
1Mesorhizobium loti MAFF303099	NP_107735
1Ochrobactrum anthropi ATCC 49188	YP_001369062
1Paracoccus denitrificans PD1222	YP_916657
1Rhizobium leguminosarum bv. trifolii WSM1325	YP_002974399
1Rhizobium leguminosarum bv. trifolii WSM2304	YP_002280037
1Ruegeria pomeroyi DSS-3	YP_168437
1Ruegeria sp. TM1040	YP_614586
1Sinorhizobium medicae WSM419	YP_001326141

## Sheet: ATP 6 and a
ATP 6 and a
Organism Name	Accession Number
1Brucella sp. F5/99	ZP_06001328
1Cryptococcus neoformans var. grubii	AAN37579
1Agaricus bitorquis	AAB03775
1Polymorphum gilvum SL003B-26A1	YP_004304265
1Allium cepa	ADA85885
1Allium cepa	ADA85887
1Anaplasma centrale str. Israel	ACZ48928
1Ruegeria sp. TM1040	YP_614588
1Phaeobacter gallaeciensis 2.10	ZP_02151170
1Anaplasma marginale str. St. Maries	YP_154217
1Anaplasma marginale str. Florida	YP_002563925
1Triglochin maritima	ADM89616
1Scheuchzeria palustris	ADM89614
1Lilaea scilloides	ADM89612
1Tetroncium magellanicum	ADM89615
1Zymomonas mobilis subsp. mobilis ZM4	YP_162402
1Gibberella zeae	ABC86603
1Fusarium oxysporum	AAW67493
1Roseobacter sp. SK209-2-6	ZP_01753761
1Roseobacter sp. MED193	ZP_01055812
1Citromicrobium sp. JLT1363	ZP_08701497
1Podospora anserina S mat+	ATP6_PODAN
1Oceanicola batsensis HTCC2597	ZP_00998603
1Ashbya gossypii ATCC 10895	ATP6_ASHGO
1Erythrobacter sp. SD-21	ZP_01863105
1Erythrobacter litoralis HTCC2594	ATP6_ERYLH
1Citromicrobium bathyomarinum JL354	ZP_06861431
1Allomyces macrogynus	ATP6_ALLMA
1Allomyces arbuscula	ATP6_ALLAR
1Sulfitobacter sp. EE-36	ZP_00954039
1Chlamys farreri	ACL36020
1Novosphingobium nitrogenifigens DSM 19370	ZP_08208775
1Sphingopyxis alaskensis RB2256	ATP6_SPHAL
1Sphingomonas wittichii RW1	YP_001264959
1Phenylobacterium zucineum HLK1	YP_002129427
1Sphingobium chlorophenolicum L-1	YP_004552551
1Rhodobacter sphaeroides WS8N	EGJ22539
1Rhodobacter sphaeroides ATCC 17025	YP_001166405
1Tilletia walkeri	YP_001876493
1Hirschia baltica ATCC 49814	YP_003059449
1Brassica napus	CBX48336
1Bartonella tribocorum CIP 105476	YP_001609055
1Novosphingobium aromaticivorans DSM 12444	YP_496594
1Parvibaculum lavamentivorans DS-1	YP_001411977
1Nakaseomyces bacillisporus	CAX36944
1Brassica napus	ATP6_BRANA
1Candida glabrata CBS 138	ATP6_CANGA
1Saccharomyces cerevisiae S288c	ATP6_YEAST
1Sulfitobacter sp. NAS-14.1	ZP_00948584
1Naumovozyma castellii	AF437291_6
1Ogataea angusta	YP_004072421
1Oceanicaulis sp. HTCC2633	ZP_00957681
1Maricaulis maris MCS10	YP_757431
1Roseovarius nubinhibens ISM	ZP_00959942
1Caulobacter sp. K31	YP_001685995
1Schizosaccharomyces pombe 972h-	ATP6_SCHPO
1Cochliobolus heterostrophus	ATP6_COCHE
1Phaeosphaeria nodorum SN15	YP_001427392
1Trametes cingulata	YP_003495102
1Zymoseptoria tritici	YP_001648758
1Suillus luteus	AAD02891
1Nakaseomyces delphensis	CAX36927
1Pleurotus ostreatus	YP_001504343
1Aspergillus tubingensis	ABA62013
1Aspergillus niger	AAS66786
1Penicillium digitatum	YP_004221872
1Penicillium chrysogenum	ATP6_PENCH
1Phialocephala subalpina	AEI52979
1Ruegeria pomeroyi DSS-3	YP_168439
1Kluyveromyces lactis NRRL Y-1140	ATP6_KLULA
1Penicillium marneffei	NP_943718
1Pichia canadensis	ATP6_PICCA
1Ajellomyces capsulatus G186AR	EEH02511
1Emericella nidulans	ATP6_EMEND
1Trichophyton rubrum	ATP6_TRIRU
1Yarrowia lipolytica CLIB122	ATP6_YARLI
1Yarrowia lipolytica	AAA78261
1Candida castellii	CAX36936
1Phakopsora pachyrhizi	YP_003795378
1Phakopsora meibomiae	YP_003795688
1Pneumocystis carinii	ACZ82940
1Sporisorium reilianum SRZ2	CBQ72554
1Ustilago maydis 521	ATP6_USTMA
1Pelagibaca bermudensis HTCC2601	ZP_01443106
1Cryptococcus neoformans var. grubii	AAT45471
1Vanderwaltozyma polyspora DSM 70294	ATP6_VANPO
1Caulobacter crescentus NA1000	YP_002515748
1Beijerinckia indica subsp. indica ATCC 9039	ATP6_BEII9
1Fulvimarina pelagi HTCC2506	ZP_01438198
1Maritimibacter alkaliphilus HTCC2654	ZP_01012204
1Oceanibulbus indolifex HEL-45	ZP_02152110
1Isoetes engelmannii	ADT62134
1Komagataella pastoris CBS 7435	YP_004362962
1Hyphomonas neptunium ATCC 15444	ATP6_HYPNA
1Chondrus crispus	ATP6_CHOCR
1Secale strictum subsp. africanum	ABD64407
1Mesorhizobium loti MAFF303099	NP_107733
1Marchantia polymorpha	ATP6_MARPO
1Neurospora crassa OR74A	ATP6_NEUCR
1Bartonella grahamii as4aup	ACS50770
1Bartonella tribocorum CIP 105476	ATP6_BART1
1Bartonella bacilliformis KC583	ATP6_BARBK
1Bartonella quintana str. Toulouse	ATP6_BARQU
1Bartonella henselae str. Houston-1	ATP6_BARHE
1Granulibacter bethesdensis CGDNIH1	YP_745688
1Acidiphilium sp. PM	ZP_08632215
1Roseobacter sp. AzwK-3b	ZP_01903969
1Oceanicola granulosus HTCC2516	ZP_01157077
1Methylobacterium sp. 4-46	ATP6_METS4
1Methylobacterium nodulans ORS 2060	YP_002502690
1Methylobacterium populi BJ001	YP_001926056
1Methylobacterium extorquens PA1	YP_001640633
1Methylobacterium radiotolerans JCM 2831	YP_001753408
1Millerozyma farinosa	YP_003204923
1Glomerella graminicola M1.001	EFQ24849
1Selaginella moellendorffii	AEA29880
1Thanatephorus cucumeris	ABC66226
1Rhodopseudomonas palustris BisB5	YP_567969
1Methylocella silvestris BL2	YP_002364066
1Loktanella vestfoldensis SKA53	ZP_01003336
1Agrobacterium radiobacter K84	ATP6_AGRRK
1Candidatus Liberibacter solanacearum CLso-ZC1	YP_004062921
1Candidatus Liberibacter asiaticus str. psy62	YP_003065501
1Rhizobium etli CFN 42	YP_468402
1Rhizobium leguminosarum bv. trifolii WSM1325	YP_002974397
1Rhizobium etli CIAT 652	ATP6_RHIE6
1Sinorhizobium fredii NGR234	ATP6_RHISN
1Sinorhizobium meliloti SM11	AEH77769
1Sinorhizobium medicae WSM419	YP_001326139
1Rhizobium leguminosarum bv. trifolii WSM2304	ATP6_RHILW
1Agrobacterium vitis S4	ATP6_AGRVS
1Rhizobium leguminosarum bv. viciae 3841	ATP6_RHIL3
1Paracoccus sp. TRP	ZP_08664248
1Xanthobacter autotrophicus Py2	YP_001416880
1Azorhizobium caulinodans ORS 571	ATP6_AZOC5
1Gluconacetobacter sp. SXCC-1	ZP_08315337
1Gluconacetobacter diazotrophicus PAl 5	ATP6_GLUDA
1Gluconobacter oxydans 621H	ATP6_GLUOX
1Oligotropha carboxidovorans OM5	ATP6_OLICO
1Acetobacter pomorum DM001	ZP_08242375
1Acetobacter aceti NBRC 14818	ZP_08697927
1Ochrobactrum anthropi ATCC 49188	YP_001371056
1Rhodobacterales bacterium HTCC2255	ZP_01447574
1Labrenzia aggregata IAM 12614	ZP_01548186
1Polymorphum gilvum SL003B-26A1	YP_004305087
1Brucella pinnipedialis B2/94	YP_004755490
1Brucella ovis ATCC 25840	ATP6_BRUO2
1Brucella neotomae 5K33	ZP_05450690
1Brucella sp. 83/13	ZP_05180377
1Ochrobactrum anthropi ATCC 49188	YP_001369060
1Hoeflea phototrophica DFL-43	ZP_02168085
1Agrobacterium sp. ATCC 31749	ZP_08526038
1Agrobacterium tumefaciens F2	EGP59035
1Chelativorans sp. BNC1	ATP6_MESSB
1Rhodopseudomonas palustris BisB18	YP_534657
1Rhodopseudomonas palustris BisA53	YP_783678
1Tetraselmis subcordiformis	CAA87756
1Bradyrhizobium japonicum USDA 110	NP_767828
1Placopecten magellanicus	AAZ06455
1Ostreococcus tauri	YP_717294
1Rhodopseudomonas palustris HaA2	ATP6_RHOP2
1Rhodopseudomonas palustris TIE-1	ATP6_RHOPT
1Roseobacter litoralis Och 149	YP_004692366
1Roseobacter denitrificans OCh 114	ATP6_ROSDO
1Rhodospirillum centenum SW	YP_002299680
1Paracoccus denitrificans PD1222	ATP6_PARDP
1Roseobacter sp. CCS2	ZP_01750684
1Agrobacterium tumefaciens F2	EGP55528
1Dinoroseobacter shibae DFL 12	ATP6_DINSH
1Pylaiella littoralis	ATP6_PYLLI
1Rickettsia massiliae MTU5	YP_001498912
1Smittium culisetae	ATP6_SMICU
1Magnetospirillum magneticum AMB-1	ATP6_MAGSA
1Rhodobacter sphaeroides KD131	YP_002526793
1Rhodobacter sphaeroides 2.4.1	ATP6_RHOS4
1Bradyrhizobium sp. ORS 278	YP_001208505
1Bradyrhizobium sp. BTAi1	YP_001237014
1Acanthamoeba castellanii	ATP6_ACACA
1Urechis caupo	AAT12191
1Nitrobacter winogradskyi Nb-255	ATP6_NITWN
1Nitrobacter sp. Nb-311A	ZP_01044855
1Nitrobacter hamburgensis X14	ATP6_NITHX
1Octopus vulgaris	BAD52276
1alpha proteobacterium BAL199	ZP_02188948
1Millerozyma farinosa	CBM41830
1Candida maltosa	YP_003434124
1Candida neerlandica	YP_002122400
1Candida albicans SC5314	ATP6_CANAL
1Candida parapsilosis	ATP6_CANPA
1Candida metapsilosis	AAR26265
1Candida orthopsilosis	YP_227581
1Candida orthopsilosis	AAR92136
1Candida sojae	YP_003434280
1Debaryomyces hansenii CBS767	ATP6_DEBHA
1Candida frijolesensis	YP_004733531
1Physarum polycephalum	ACI25321
1Physarum polycephalum	ADZ99032
1Didymium iridis	ACZ96457
1Ruditapes philippinarum	BAB83777
1Ruditapes philippinarum	AF484337_3
1Ruditapes philippinarum	AF484340_2
1Ruditapes philippinarum	AF484339_2
1Ruditapes philippinarum	AF484336_16
1Ruditapes philippinarum	BAB83790
1Candidatus Pelagibacter ubique HTCC1062	ATP6_PELUB
1Dictyostelium discoideum	ATP6_DICDI
1Dictyostelium citrinum	ATP6_DICCI
1Mizuhopecten yessoensis	ACL36043
1Roseovarius sp. TM1035	ZP_01878350
1Ehrlichia chaffeensis str. Arkansas	ATP6_EHRCR
1Ehrlichia ruminantium str. Welgevonden	ATP6_EHRRW
1Ehrlichia canis str. Jake	ATP6_EHRCJ
1Neorickettsia sennetsu str. Miyayama	YP_506283
1Neorickettsia risticii str. Illinois	YP_003081599
1Orientia tsutsugamushi str. Ikeda	ATP6_ORITI
1Orientia tsutsugamushi str. Boryong	ATP6_ORITB
1Rickettsia bellii OSU 85-389	ATP6_RICB8
1Rickettsia bellii RML369-C	ATP6_RICBR
1Lingula anatina	BAD69577
1Anaplasma phagocytophilum HZ	ATP6_ANAPZ
1Rickettsia akari str. Hartford	ATP6_RICAH
1Rickettsia rickettsii str. Iowa	ATP6_RICRO
1Rickettsia heilongjiangensis 054	YP_004763744
1Rickettsia africae ESF-5	ATP6_RICAE
1Rickettsia peacockii str. Rustic	ATP6_RICPU
1Rickettsia felis URRWXCal2	ATP6_RICFE
1Rickettsia conorii str. Malish 7	ATP6_RICCN
1Rickettsia massiliae MTU5	ATP6_RICM5
1Rickettsia prowazekii str. Madrid E	ATP6_RICPR
1Rickettsia canadensis str. McKiel	ATP6_RICCK
1Rickettsia typhi str. Wilmington	ATP6_RICTY
1Paulinella chromatophora	YP_002048860
1Maundia triglochinoides	ADM89613
1Cryptococcus gattii	ACR84569
1Cryptococcus gattii	ACR84524
1Cryptococcus gattii	ACR84553
1Cryptococcus gattii	ACR84529
1Cryptococcus gattii	ACR84523
1Thanatephorus cucumeris	ABC66225
1Wolbachia endosymbiont strain TRS of Brugia malayi	ATP6_WOLTR
1Wolbachia endosymbiont of Culex quinquefasciatus Pel	ATP6_WOLPP
1Wolbachia endosymbiont of Drosophila melanogaster	ATP6_WOLPM
1Wolbachia endosymbiont of Muscidifurax uniraptor	ZP_03787702
1Wolbachia sp. wRi	ATP6_WOLWR
1Rhodospirillum rubrum	ATP6_RHORU
1Anaplasma marginale str. St. Maries	ATP6_ANAMM
1Anaplasma marginale str. Mississippi	ZP_05277503
1Thanatephorus cucumeris	ABC66219
1Conidiosporomyces ayresii	ABK34533
1Mytilus galloprovincialis	AAQ63690
1Mytilus edulis	ATP6_MYTED
1Keratoisidinae sp. BAL208-1	ABQ86203
1Rhodobacter capsulatus	ATP6_RHOCA
1Chrysopathes formosa	ABB90977
1Petromyzon marinus	ATP6_PETMA
1Acanella eburnea	ABR19867
1Thanatephorus cucumeris	ABC66217
1Ustilago striiformis	ABK34553
1Tilletia hyalospora	ABK34541
1Moesziomyces bullatus	ABK34544
1Thanatephorus cucumeris	ACJ67227
1Microstroma juglandis	ABK34543
1Ustilago avenae	ABK34550
1Sporisorium sorghi	ABK34548
1Ustilago davisii	ABK34552
1Moesziomyces eriocauli	ABK34545
1Melanopsichium pennsylvanicum	ABK34542
1Entyloma gaillardianum	ABK34537
1Roseovarius sp. 217	ZP_01037854
1Sagittula stellata E-37	ZP_01748174
1Loxosomella aloxiata	BAG12589
1Loligo bleekeri	BAB03657
1Ceratobasidium sp. CBS 137.82	ABC66211
1Loxocorone allax	BAG12576
1Gluconobacter oxydans 621H	AAW61907
1Symsagittifera roscoffensis	ADI75243
1Rhodactina sp. CMU45209	ABC61051
1Viridispora diparietispora	ABS88126
1Simplicillium lamellicola	ABS88118
1Lecanicillium tenuipes	ABS88092
1Acropora tenuis	AF338425_6
1Paracentrotus lividus	ATP6_PARLI
1Rhodopseudomonas palustris TIE-1	YP_001990083
1Haptocillium sinense	ABS88095
1Thanatephorus cucumeris	ACJ67222
1Silene vulgaris	ABO39107
1Silene vulgaris	ABV25200
1Silene vulgaris	ABO39101
1Silene vulgaris	ABV25192
1Silene stellata	ABV25232
1Silene latifolia	ABV25230
1Lychnis coronaria	ABV25233
1Silene acaulis	ABV25231
1Silene paradoxa	ABO39192
1Silene vulgaris	ABO39099
1Silene vulgaris	ABV25188
1Haliotis tuberculata ssp. AVW-2009	ACL99791
1Haliotis tuberculata	ACL99804
1Haliotis tuberculata coccinea	ACL99778
1Platynereis dumerilii	AF178678_1
1Lumbricus terrestris	ATP6_LUMTE
1Phaethon rubricauda	BAE92893
1Scophthalmus maximus	ABY79840
1Scophthalmus maximus	AEH05961
1Beijerinckia indica subsp. indica ATCC 9039	YP_001833837
1Sepia esculenta	BAF73653
1Mimachlamys nobilis	ACJ64174
1Vampyroteuthis infernalis	BAF73641
1Deracantha onos	ABV23668
1Acanthaster brevispinus	BAE79185
1Acanthaster planci	BAE79172
1Patiria pectinifera	ATP6_ASTPE
1Ceratobasidium sp. AG-P	ABC66209
1Myriostoma coliforme	ABI97630
1Dinoroseobacter shibae DFL 12	YP_001531788
1Trypanosoma brucei brucei	ATP6_TRYBB
1Metridium senile	ATP6_METSE
1Novosphingobium nitrogenifigens DSM 19370	ZP_08209229
1Strongylocentrotus purpuratus	ATP6_STRPU
1Geastrum fornicatum	ABI97625
1Doassansiopsis limnocharidis	ABK34536
1Cobitis zanandreai	AAK72170
1Apocrypta bakeri	ACD70301
1Myxine glutinosa	ATP6_MYXGL
1Asymmetron inferum	BAF76602
1Asymmetron lucayanum	BAF76628
1Asymmetron lucayanum	BAD72147
1Pisaster ochraceus	ATP6_PISOC
1Pelomedusa subrufa	ATP6_PELSU
1Asymmetron sp. A TK-2007	BAF76615
1Hyla chinensis	AAT07865
1Astyanax mexicanus	AF287358_1
1Acestrorhynchus grandoculis	ACS34737
1Amphiprion sebae	AAP75194
1Amphiprion melanopus	AAP75176
1Amphiprion chrysogaster	AAP75164
1Amphiprion chrysopterus	AAP75168
1Amphiprion omanensis	AAP75186
1Amphiprion omanensis	AAP75184
1Amphiprion allardi	AAP75160
1Amphiprion clarkii	AAP75172
1Amphiprion perideraion	AAP75190
1Amphiprion akallopisos	AAP75152
1Bryconamericus ricae	AAQ03271
1Eretmobrycon bayano	AAQ03253
1Bryconamericus terrabensis	AAQ03287
1Bryconamericus terrabensis	AAQ03285
1Eretmobrycon bayano	AAQ03261
1Eretmobrycon bayano	AAQ03259
1Cyphocharax magdalenae	AF412941_2
1Cyphocharax magdalenae	AF412940_2
1Cyphocharax magdalenae	AF412935_2
1Acestrorhynchus falcatus	ACS34731
1Acestrorhynchus falcatus	ACS34724
1Amphiprion melanopus	AAP75174
1Cynoglossus semilaevis	ABY59939
1Plesiobatis daviesi	YP_272007
1Galeichthys sp. SAIAB 78771	ACM50336
1Gogo arcuatus	ACM50330
1Nemapteryx armiger	ACN11866
1Brustiarius proximus	ACN11750
1Nemapteryx aff. armiger RB-2009	ACN11868
1Brustiarius proximus	ACN11752
1Galeichthys feliceps	ACM50334
1Cinetodus froggatti	ACM50350
1Cinetodus carinatus	ACN11850
1Cinetodus carinatus	ACN11852
1Plicofollis tonggol	ACN11744
1Sciades platypogon	AAT91101
1Arius gagora	ACN11754
1Cryptarius truncatus	ACN11792
1Cryptarius truncatus	ACN11790
1Sciades herzbergii	ACN11678
1Neoarius leptaspis	ACN11900
1Cochlefelis danielsi	ACN11856
1Hemiarius sona	ACN11832
1Neoarius leptaspis	ACN11902
1Potamosilurus macrorhynchus	ACN11880
1Ariopsis sp. RB-2009	ACN11630
1Ariopsis sp. RB-2009	ACN11628
1Nedystoma novaeguineae	ACN11860
1Nedystoma novaeguineae	ACM50354
1Plicofollis aff. argyropleuron 1 RB-2009	ACN11706
1Plicofollis layardi	ACN11722
1Plicofollis aff. layardi RB-2009	ACN11724
1Cinetodus froggatti	ACN11854
1Plicofollis dussumieri	ACN11720
1Osteogeneiosus militaris	ACM50346
1Osteogeneiosus militaris	ACN11810
1Arius oetik	ACN11772
1Brustiarius nox	ACN11840
1Plicofollis aff. polystaphylodon RB-2009	ACN11738
1Plicofollis nella	ACN11730
1Sciades mastersi	ACN11908
1Carlarius parkii	ACN11686
1Neoarius midgleyi	ACN11910
1Potamosilurus latirostris	ACN11896
1Carlarius latiscutatus	ACN11682
1Cephalocassis melanochir	ACN11788
1Arius madagascariensis	ACN11692
1Nemapteryx aff. nenga RB-2009	ACN11818
1Nemapteryx aff. nenga RB-2009	ACN11820
1Hemiarius dioctes	ACN11894
1Neoarius utarus	ACN11846
1Plicofollis cf. polystaphylodon RB-2009	ACN11734
1Nemapteryx nenga	ACN11814
1Carlarius heudelotii	ACM50340
1Arius madagascariensis	ACN11688
1Amissidens hainesi	ACN11836
1Plicofollis aff. argyropleuron 2 RB-2009	ACN11714
1Cephalocassis borneensis	ACN11796
1Arius aff. sp. A RB-2009	ACN11784
1Arius aff. sp. A RB-2009	ACN11786
1Arius sp. A RB-2009	ACN11778
1Arius maculatus	ACN11766
1Arius maculatus	ACN11770
1Cinetodus crassilabris	ACN11876
1Genidens genidens	ACN11658
1Genidens planifrons	ACN11666
1Nedystoma dayi	ACN11862
1Neoarius aff. leptaspis RB-2009	ACN11904
1Potamosilurus coatesi	ACN11878
1Rhamdia laticauda	AF287412_1
1Potamosilurus velutinus	ACN11882
1Neoarius berneyi	ACN11870
1Neoarius aff. graeffei 2 RB-2009	ACN11874
1Arius leptonotacanthus	ACN11756
1Neoarius graeffei	ACM50356
1Sciades passany	ACN11680
1Netuma aff. bilineata RB-2009	ACN11700
1Arius arius	AAT91103
1Netuma thalassina	ACM50342
1Cochlefelis spatula	ACN11858
1Netuma aff. thalassina RB-2009	ACN11702
1Cathorops multiradiatus	ACN11646
1Cathorops cf. festae RB-2009	ACN11636
1Cathorops mapale	AAT97071
1Cathorops manglarensis	ACN11644
1Cathorops cf. higuchii RB-2009	ACN11640
1Cathorops arenatus	ACN11634
1Plicofollis argyropleuron	ACM50344
1Chromis atripes	AAP75216
1Chromis margaritifer	AAP75242
1Chromis iomelas	AAP75238
1Chromis iomelas	AAP75236
1Chromis agilis	AAP75204
1Chromis retrofasciata	AAP75254
1Chromis atripes	AAP75218
1Chromis amboinensis	AAP75208
1Chromis retrofasciata	AAP75252
1Dascyllus trimaculatus	AAM96489
1Chrysiptera taupou	AAP75348
1Chrysiptera taupou	AAP75350
1Chrysiptera cyanea	AAP75320
1Microspathodon chrysurus	AAP75358
1Microspathodon chrysurus	AAP75360
1Pomacentrus leptus	AAP75430
1Chromis chrysura	AAP75226
1Pomacentrus smithi	AAP75460
1Neoglyphidodon oxyodon	AAP75368
1Dascyllus melanurus	AAM96429
1Dascyllus aruanus	AAM96363
1Dascyllus aruanus	AAM96379
1Dascyllus aruanus	AAM96357
1Pomacentrus moluccensis	AAP75436
1Dascyllus trimaculatus	AAM96495
1Dascyllus trimaculatus	AAM96497
1Dascyllus reticulatus	AAM96455
1Dascyllus reticulatus	AAM96459
1Dascyllus reticulatus	AAM94435
1Dascyllus marginatus	AAM96419
1Dascyllus reticulatus	AAM94437
1Dascyllus reticulatus	AAM94439
1Dascyllus aruanus	AAM96347
1Dascyllus flavicaudus	AAM96411
1Pomacentrus bankanensis	AAP75408
1Chrysiptera talboti	AAP75346
1Chrysiptera hemicyanea	AAP75330
1Chrysiptera annulata	AAP75316
1Chromis flavomaculata	AAP75234
1Neoglyphidodon melas	AAP75362
1Scleropages leichardti	ACP04289
1Cobitis bilineata	AAP30574
1Cobitis elongata	AAK72130
1Cobitis hellenica	AAP30618
1Misgurnus fossilis	AAK72186
1Formosania lacustris	ATP6_FORLA
1Sabanejewia larvata	AAL29534
1Sabanejewia larvata	AAL29538
1Sabanejewia larvata	AAL29540
1Sabanejewia larvata	AAL29536
1Sabanejewia romanica	AAK72182
1Sabanejewia romanica	AAK72184
1Sabanejewia romanica	AAQ07390
1Sabanejewia romanica	AAQ07388
1Cobitis strumicae	AAP30606
1Cobitis calderoni	AAP30564
1Cobitis calderoni	AAK72132
1Sabanejewia aurata kubanica	AAQ07362
1Sabanejewia aurata kubanica	AAQ07364
1Sabanejewia caucasica	AAL29544
1Sabanejewia aurata	AAQ07376
1Sabanejewia aurata	AAQ07374
1Sabanejewia caucasica	AAL29546
1Cobitis strumicae	AAP30608
1Cobitis punctilineata	AAP30612
1Cobitis elongatoides	AAP30584
1Cobitis elongatoides	AAP30586
1Cobitis paludica	AAP30558
1Cobitis maroccana	AAK72144
1Cobitis maroccana	AAK72142
1Cobitis paludica	AAP30560
1Sabanejewia balcanica	AAQ07380
1Sabanejewia radnensis	AAL29584
1Sabanejewia thrakica	AAL29592
1Sabanejewia balcanica	AAL29560
1Sabanejewia montana	AAQ07396
1Sabanejewia balcanica	AAK72178
1Sabanejewia vallachica	AAL29602
1Sabanejewia balcanica	AAQ07386
1Sabanejewia balcanica	AAL29566
1Sabanejewia radnensis	AAL29586
1Sabanejewia montana	AAQ07394
1Sabanejewia montana	AAQ07392
1Sabanejewia doiranica	AAL29576
1Sabanejewia balcanica	AAQ07340
1Sabanejewia balcanica	AAQ07382
1Sabanejewia bulgarica	AAL29574
1Sabanejewia balcanica	AAK72180
1Sabanejewia vallachica	AAL29608
1Cobitis ohridana	AAP30580
1Cobitis ohridana	AAP30578
1Sabanejewia balcanica	AAL29552
1Sabanejewia balcanica	AAL29554
1Cobitis meridionalis	AAK72158
1Cobitis taenia	AAP30582
1Cobitis vardarensis	AAP30592
1Cobitis vardarensis	AAP30588
1Cobitis vardarensis	AAK72150
1Cobitis taenia	AAK72148
1Sabanejewia aurata	AAQ07358
1Sabanejewia aurata	AAQ07356
1Sabanejewia aurata	AAQ07370
1Cobitis cf. sibirica	AAK72128
1Sabanejewia baltica	AAL29548
1Cobitis zanandreai	AAP30576
1Cobitis vettonica	AAK72138
1Cobitis elongatoides	AAK72154
1Cobitis vardarensis	AAK72152
1Cobitis taenia	AAK72146
1Cobitis meridionalis	AAK72160
1Cobitis stephanidisi	AAP30596
1Cobitis stephanidisi	AAP30594
1Sabanejewia balcanica	AAQ07378
1Sabanejewia larvata	AAL29530
1Sabanejewia larvata	AAL29532
1Cobitis trichonica	AAK72162
1Cobitis trichonica	AAK72164
1Barbatula barbatula	AAK72188
1Brycon guatemalensis	AAQ03531
1Brycon behreae	AAQ03489
1Brycon n. sp. _Howes_	AAQ03543
1Brycon striatulus	AAQ03561
1Brycon n. sp. _Howes_	AAQ03539
1Brycon striatulus	AAQ03551
1Brycon behreae	AAQ03485
1Brycon chagrensis	AAQ03499
1Brycon chagrensis	AAQ03495
1Brycon behreae	AAQ03479
1Chromis cyanea	AAP75230
1Chromis multilineata	AAP75244
1Cobitis bilineata	AAP30572
1Cobitis bilineata	AAP30568
1Cobitis bilineata	AAP30566
1Cobitis vettonica	AAK72136
1Acestrorhynchus minimus	ACS34749
1Cobitis bilineata	AAK72176
1Cobitis bilineata	AAP30570
1Stellifer illecebrosus	ACV95896
1Bairdiella armata	ACV95897
1Bairdiella ronchus	ACV95898
1Macrodon mordax	ACV95888
1Macrodon ancylodon	ACV95887
1Rhodobacter sphaeroides KD131	YP_002523237
1Rhodobacter sphaeroides ATCC 17029	YP_001041814
1Rhodobacter sphaeroides WS8N	ZP_08415689
1Guaruba guarouba	ABA19287
1Nisaetus alboniger	BAE46863
1Hyla japonica	BAF96756
1Hyla meridionalis	ABM63607
1Hyla meridionalis	ABM63670
1Hyla meridionalis	ABM63673
1Hyla meridionalis	ABM63652
1Hyla meridionalis	ABM63634
1Hyla meridionalis	ABM63655
1Hyla meridionalis	ABM63685
1Microhyla okinavensis	BAF96769
1Kaloula pulchra	AAT07891
1Microhyla heymonsi	AAT07904
1Microhyla ornata	ABF14624
1Acanthisitta chloris	AAQ91098
1Synodus variegatus	YP_271981
1Neopomacentrus cyanomos	AAP75372
1Neopomacentrus filamentosus	AAP75376
1Neopomacentrus nemurus	AAP75384
1Pomachromis fuscidorsalis	AAP75468
1Nisaetus nipalensis	BAE46850
1Pionus maximiliani	ABA19344
1Rhynchopsitta pachyrhyncha	ABA19362
1Pionus menstruus	AAT76822
1Pionus chalcopterus	AAT76828
1Primolius auricollis	ABA19302
1Orthopsittaca manilata	ABA19347
1Nannopsittaca dachilleae	ABA19329
1Amazona xanthops	ABA19311
1Pionopsitta caica	AAT76817
1Pionopsitta haematotis	AAT76821
1Pionopsitta haematotis	AAT76819
1Pionopsitta haematotis	AAT76818
1Pionopsitta caica	AAT76815
1Pionopsitta barrabandi	ABA19353
1Pionopsitta vulturina	AAT76810
1Pionopsitta pulchra	AAT76827
1Pionopsitta pulchra	AAT76825
1Pionopsitta pulchra	AAT76824
1Diopsittaca nobilis	ABA19284
1Amazona ochrocephala nattereri	AAP32355
1Amazona oratrix	AAP32374
1Amazona ochrocephala tresmariae	AAP32376
1Amazona ochrocephala panamensis	AAP32382
1Amazona oratrix belizensis	AAP32360
1Pionites leucogaster	ABA19350
1Cyanoliseus patagonus	ABA19281
1Bolborhynchus lineola	ABA19326
1Amazona amazonica	AAP32383
1Amazona autumnalis	AAP32363
1Graydidascalus brachyurus	ABA19365
1Enicognathus leptorhynchus	ABA19296
1Amazona farinosa	AAP32378
1Ara ararauna	ABA19368
1Myiopsitta monachus	ABA19356
1Aratinga aurea	ABA19293
1Amazona ochrocephala ochrocephala	AAP32377
1Cyanopsitta spixii	ABA19305
1Anodorhynchus hyacinthinus	ABA19278
1Deroptyus accipitrinus	ABA19335
1Aratinga leucophthalma	ABA19290
1Amazona farinosa	ABA19308
1Aratinga solstitialis	ABA19338
1Nandayus nenday	ABA19299
1Scyliorhinus canicula	ATP6_SCYCA
1Melopsittacus undulatus	ABA19320
1Parastichopus nigripunctatus	BAI45145
1Apostichopus japonicus	BAI45186
1Apostichopus japonicus	BAI45119
1Vanhornia eucnemidarum	ABB92703
1Puntius denisonii	ADD17046
1Puntius denisonii	ADD17048
1Puntius denisonii	ADD17028
1Puntius denisonii	ADD17032
1Puntius denisonii	ADD17030
1Barbus fritschii	AF287381_2
1Puntius chalakkudiensis	ADD17020
1Barbus callensis	AF317393_2
1Barbus plebejus	AAG29328
1Barbus macedonicus	AAG29336
1Barbus barbus thessalus	AF287365_2
1Barbus macedonicus	AF287362_2
1Barbus sp. MNCN 3AL	AF317413_2
1Barbus sp. MNCN141AL	AAG29314
1Barbus peloponnesius	AF287390_2
1Barbus graellsii	AF317395_2
1Luciobarbus bocagei	AAG29284
1Barbus comizo	AAG29298
1Luciobarbus bocagei	AAG29252
1Barbus rebeli	AF287401_2
1Luciobarbus microcephalus	AF317398_2
1Luciobarbus graecus	AF317396_2
1Luciobarbus guiraonis	AF317397_2
1Barbus labiosa	AF317405_2
1Barbus sp. MNCN 244A	AF317404_2
1Barbus petenyi	AF287397_2
1Barbus petenyi	AF287398_2
1Luciobarbus capito	AF317394_2
1Barbus moulouyensis	AF317407_2
1Barbus biscarensis biscarensis	AF317403_2
1Barbus biscarensis amguidensis	AAG29276
1Aspistor quadriscutis	AAT91099
1Amphiarius rugispinis	AAT91097
1Notarius lentiginosus	ACN11676
1Notarius aff. planiceps RB-2004	AAT91094
1Notarius armbrusteri	ABD38565
1Notarius insculptus	AAT91095
1Notarius kessleri	AAT91092
1Notarius neogranatensis	AAT91091
1Notarius cookei	AAT81535
1Notarius aff. kessleri RB-2009	ACN11674
1Notarius aff. kessleri RB-2009	ACN11672
1Ariopsis bonillai	AAT81536
1Notarius biffi	AAT91096
1Sciades troschelii	AAT91098
1Notarius planiceps	AAT91093
1Chrysiptera leucopoma	AAP75334
1Neopomacentrus miryae	AAP75380
1Pomacentrus nigromanus	AAP75444
1Neopomacentrus sindensis	AAP75388
1Chromis atrilobata	AAP75212
1Premnas biaculeatus	AAP75196
1Pomacentrus brachialis	AAP75412
1Pomacentrus australis	AAP75406
1Chromis multilineata	AAM94457
1Chrysiptera rex	AAP75338
1Pomacentrus pavo	AAP75448
1Platichthys stellatus	ABN48617
1Chromis nitida	AAP75250
1Chrysiptera galba	AAP75324
1Chromis multilineata	AAP75246
1Chromis multilineata	AAM94453
1Chromis multilineata	AAM94455
1Forpus crassirostris	ABA19317
1Barbus anoplus	AF287361_2
1Barbus gurneyi	AF287383_2
1Pseudobarbus afer	AF287406_2
1Pseudobarbus tenuis	AF287410_2
1Pseudobarbus phlegethon	AF287408_2
1Pseudobarbus asper	AF287407_2
1Barbus motebensis	AF287387_2
1Barbus meridionalis	AF287386_2
1Chrysiptera glauca	AAP75328
1Occidozyga martensii	ACZ02642
1Danio rerio	ATP6_DANRE
1Barbus bigornei	AF317414_2
1Barbus nasus	AF317408_2
1Barbus magniatlantis	AF317410_2
1Barbus sp. MNCN27TZ	AAG29292
1Luciobarbus sclateri	AF317400_2
1Barbus massaensis	AAG29310
1Barbus brachycephalus	AAG29288
1Barbus brachycephalus	AAG29286
1Barbus setivimensis	AF317412_2
1Varicorhinus maroccanus	AF287413_2
1Neolissochilus sp. 2 MM-2010	ADT91624
1Barbus bynni occidentalis	AF287367_2
1Barbus petitjeani	AF287399_2
1Barbus wurtzi	AF287404_2
1Barbus gruveli	AF287382_2
1Barbus sacratus	AF287403_2
1Labeobarbus marequensis	AF287385_2
1Barbus reinii	AF287402_2
1Barbus fritschii	AF287380_2
1Carassius auratus	ACL52283
1Carassius auratus	ATP6_CARAU
1Gymnocypris przewalskii	BAF41563
1Cyprinus carpio	ATP6_CYPCA
1Puntius conchonius	AAG29330
1Barbus paludinosus	AF287389_2
1Barbus albanicus	AAG29272
1Aulopyge huegelii	AF287360_2
1Barbus strumicae	AF287377_2
1Barbus euboicus	AF287378_2
1Barbus euboicus	AF287379_2
1Barbus peloponnesius	AF287391_2
1Barbus lepineyi	AF317409_2
1Barbus lepineyi	AF317406_2
1Barbus antinorii	AF317402_2
1Barbus albanicus	AAG29274
1Barbus haasi	AF317399_2
1Acanthopagrus latus	ABO64365
1Myxocyprinus asiaticus	YP_138245
1Branchiostoma floridae	ATP6_BRAFL
1Branchiostoma lanceolatum	ATP6_BRALA
1Erythrura prasina	AAM70694
1Peucedramus taeniatus	AAM70748
1Zeledonia coronata	AF382959_2
1Euphonia fulvicrissa	AF382975_2
1Alethe diademata	AAX14134
1Selenidera culik	AAT74434
1Pandion haliaetus	ABG37777
1Celeus brachyurus	ACE74393
1Otis tarda	ACN29667
1Synthliboramphus antiquus	BAE92880
1Opisthocomus hoazin	AAP33118
1Eudynamys taitensis	ABY82521
1Opisthocomus hoazin	AAP33126
1Opisthocomus hoazin	AAQ92326
1Struthio camelus	ATP6_STRCA
1Apteryx owenii	ACY28897
1Geococcyx californianus	ABY82534
1Aegotheles cristatus	ABY26875
1Pterodroma brevirostris	AAO20288
1Squalus acanthias	ATP6_SQUAC
1Ninox novaeseelandiae	AAP47811
1Paramesotriton hongkongensis	AAT07917
1Bombina bombina	AAT07839
1Cnemotriccus fuscatus	AAT46111
1Porphyrio hochstetteri	ABO93101
1Archilochus colubris	ABO93114
1Colaptes melanochloros	ACE74385
1Campephilus haematogaster	ACE74377
1Picus rabieri	ACE74374
1Gallus gallus	ATP6_CHICK
1Anas platyrhynchos	ATP6_ANAPL
1Anseranas semipalmata	AAP47785
1Teretistris fernandinae	AF382960_2
1Helmitheros vermivorum	AAV63774
1Dendroica castanea	AAV63584
1Vermivora peregrina	AAV63754
1Dendroica vitellina vitellina	AAS55037
1Dendroica vitellina crawfordi	AAS55039
1Protonotaria citrea	AAV63744
1Basileuterus fulvicauda	AAR32874
1Oporornis philadelphia	AAV63699
1Setophaga petechia	AF382957_2
1Setophaga graciae	AAV63659
1Dendroica pinus	AAV63734
1Vestiaria coccinea	AAM70790
1Spindalis zena	AF382979_2
1Basileuterus fulvicauda	AAR32859
1Basileuterus rivularis	AAR32869
1Dendroica striata	AAV63599
1Xenoligea montana	AF382983_2
1Piranga rubra	AAM70757
1Passerina cyanea	AAM70745
1Cardinalis phoeniceus	AAM70661
1Basileuterus leucoblepharus	AAR86207
1Basileuterus fulvicauda	AAR32854
1Basileuterus flaveolus	AAR86212
1Oporornis tolmiei	AAV63689
1Dendroica coronata	AAV63784
1Dendroica fusca	AAR32819
1Geothlypis trichas	AAV63644
1Vermivora pinus	AAV63604
1Basileuterus rivularis	AAR32879
1Emberiza spodocephala	AAM70688
1Vermivora chrysoptera	AAV63654
1Molothrus ater	AAM70730
1Cardellina rubrifrons	AF382987_2
1Ergaticus ruber	AF382971_2
1Icterus galbula	AAM70718
1Basileuterus rivularis	AAR32849
1Ploceus bicolor	AAM70763
1Vermivora virginiae	AAV63764
1Vermivora ruficapilla	AAV63704
1Basileuterus tristriatus	AF382974_2
1Limnothlypis swainsonii	AAV63749
1Basileuterus fulvicauda	AAR32844
1Wilsonia pusilla	AAV63769
1Seiurus aurocapilla	AAV63724
1Basileuterus rufifrons	AAR32824
1Basileuterus fulvicauda	AAQ62811
1Dendroica nigrescens	AAV63619
1Coereba flaveola	ABU52009
1Coereba flaveola	ABU51983
1Coereba flaveola	ABU52003
1Dendroica cerulea	AAV63634
1Dendroica dominica	AAV63839
1Seiurus noveboracensis	AAV63714
1Thryothorus semibadius	AAM52437
1Thryothorus nigricapillus	AAM52463
1Thryothorus nigricapillus	AAM52447
1Thryothorus nigricapillus	AAM52473
1Thryothorus nigricapillus	AAM52467
1Thryothorus nigricapillus	AAM52445
1Thryothorus nigricapillus	AAM52449
1Thryothorus nigricapillus	AAM52461
1Thryothorus nigricapillus	AAM52477
1Thryothorus rutilus	AAM52441
1Thryothorus rutilus	AAM52439
1Thryothorus rutilus	AAM52443
1Spiza americana	AAM70775
1Hypsipetes madagascariensis	AAU07736
1Nectarinia senegalensis	AAM70736
1Phainoptila melanoxantha	AAM45417
1Phainoptila melanoxantha	AAM45429
1Phainoptila melanoxantha	AAM45407
1Phainoptila melanoxantha	AAM45425
1Basileuterus rivularis	AAQ62803
1Basileuterus fulvicauda	AAR32864
1Basileuterus rivularis	AAR32829
1Dendroica virens	AAV63614
1Dendroica occidentalis	AAV63664
1Myioborus miniatus	AF382976_2
1Dendroica tigrina	AAV63624
1Loxia curvirostra	AAM70727
1Serinus serinus	AAM70772
1Dendroica townsendi	AAV63759
1Carpodacus mexicanus	AAM70667
1Hypsipetes olivaceus	AAU07742
1Hypsipetes crassirostris	AAU07754
1Microligea palustris	AF382982_2
1Catamblyrhynchus diadema	AAM70670
1Piranga olivacea	AAM70754
1Plectrophenax nivalis	AAM70760
1Sturnella magna	AAM70778
1Dolichonyx oryzivorus	AAM70685
1Fringilla coelebs	AAM70700
1Pheucticus ludovicianus	AAM70751
1Prunella montanella	AAM70766
1Passer domesticus	AAM70742
1Malurus alboscapulatus naimii	AEK12193
1Malurus lamberti lamberti	AEK12199
1Alethe poliocephala	AAX14118
1Ixos philippinus	AAU07752
1Hypsipetes parvirostris moheliensis	AAU07744
1Hypsipetes madagascariensis rostratus	AAU07756
1Hypsipetes parvirostris parvirostris	AAU07746
1Vermivora luciae	AAV63684
1Mniotilta varia	AAV63589
1Euthlypis lachrymosa	AF382970_2
1Wilsonia citrina	AAV63669
1Catharopeza bishopi	AF382985_2
1Parula americana	AAV63709
1Myioborus brunniceps	AF382992_2
1Saxicola rubicola	ACN51313
1Thryothorus nigricapillus	AAM52481
1Malurus campbelli	AEK12198
1Hypsipetes borbonicus	AAU07728
1Saxicola torquata axillaris	ACN51311
1Euphonia laniirostris	AAM70697
1Malurus leucopterus leuconotus	ADQ27944
1Hypsipetes madagascariensis	AAU07748
1Seiurus motacilla	AAV63679
1Granatellus pelzelni	AF382956_2
1Alethe diademata	AAX14074
1Alethe diademata	AAX14148
1Alethe diademata	AAX14130
1Alethe diademata	AAX14092
1Alethe diademata	AAX14150
1Alethe diademata	AAX14080
1Alectura lathami	AAR10282
1Falco sparverius	ABG37725
1Coturnix japonica	ATP6_COTJA
1Rhynochetos jubatus	ABO93088
1Oporornis agilis	AAV63649
1Dryocopus martius	ACE74387
1Ardea novaehollandiae	ABG37699
1Egretta eulophotes	ABS82060
1Meiglyptes tristis	ACE74396
1Picus puniceus	ACE74364
1Picus viridis	ACE74382
1Picus flavinucha	ACE74381
1Picus xanthopygaeus	ACE74367
1Picus canus	ACE74378
1Picus erythropygius	ACE74365
1Cathartes aura	AAR19053
1Trogon viridis	ABY82560
1Hemiphaga novaeseelandiae	ACH92642
1Picus flavinucha	ACE74366
1Mulleripicus funebris	ACE74391
1Picoides mixtus	ACE74386
1Pelecanus conspicillatus	ABG37764
1Phoenicopterus roseus	ABO93075
1Thalassarche melanophrys	AAO18353
1Larus dominicanus	AAQ63025
1Megaceryle maxima	ABU68970
1Picus chlorolophus	ACE74390
1Picus awokera	ACE74370
1Pteroglossus pluricinctus	AAT74423
1Pteroglossus viridis	AAT74433
1Picus viridanus	ACE74376
1Dryocopus lineatus	ACE74380
1Piculus chrysochloros	ACE74379
1Geocolaptes olivaceus	ACE74388
1Gecinulus grantia	ACE74395
1Campethera nivosa	ACE74394
1Campethera caroli	ACE74389
1Celeus lugubris	ACE74383
1Picus mentalis	ACE74384
1Baillonius bailloni	AAT74402
1Dinopium javanense	ACE74392
1Picus canus	ACE74369
1Dryocopus pileatus	ABG37712
1Nyctibius grandis	ABY26850
1Pteroglossus torquatus	AAT74429
1Pteroglossus sanguineus	AAT74425
1Pteroglossus torquatus	AAT74427
1Pteroglossus azara flavirostris	AAT74413
1Pteroglossus mariae	AAT74421
1Tachybaptus novaehollandiae	ABO93127
1Pteroglossus bitorquatus	AAT74407
1Pteroglossus castanotis	AAT74409
1Pteroglossus castanotis	AAT74408
1Pteroglossus aracari	AAT74404
1Pteroglossus inscriptus	AAT74419
1Pteroglossus inscriptus	AAT74414
1Pteroglossus beauharnaesii	AAT74405
1Anhinga rufa	YP_004021435
1Buteo buteo	AF380305_6
1Phalacrocorax chalconotus	YP_004021408
1Accipiter gentilis	BAH03686
1Gallirallus okinawae	BAH24066
1Coturnicops exquisitus	BAH24092
1Gavia stellata	AAQ63012
1Eurystomus orientalis	ABY26862
1Rallina eurizonoides sepiaria	BAH24079
1Basileuterus fulvicauda	AAQ62817
1Basileuterus fulvicauda	AAQ62789
1Balanoglossus carnosus	AAD11956
1Alethe diademata	AAX14100
1Agapornis roseicollis	ABY82508
1Tyto alba	ABY82573
1Menura novaehollandiae	AAS17739
1Sturnella militaris	AAM70724
1Carduelis pinus	AAM70664
1Alethe diademata	AAX14110
1Alcedo leucogaster	ABU68922
1Alcedo leucogaster	ABU68926
1Halcyon malimbica	ABU68966
1Todiramphus sanctus vagans	ABY82547
1Coryphospingus cucullatus	AAM70679
1Tangara mexicana	AAM70781
1Tiaris olivaceus	ABU52013
1Myioborus pictus	AF382972_2
1Geospiza fortis	AAM70703
1Malurus cyanocephalus bonapartii	AEK12196
1Micrastur gilvicollis	ABG37738
1Picus vittatus	ACE74372
1Ceyx lecontei	ABU68954
1Ceyx pictus	ABU68962
1Hemispingus frontalis	AF382981_2
1Hemispingus frontalis	AAM70712
1Buthraupis montana	AAM70649
1Alcedo quadribrachys	ABU68938
1Alcedo leucogaster nais	ABU68934
1Alcedo atthis	ABU68906
1Alcedo cristata thomensis	ABU68946
1Ceyx erithaca	ABU68950
1Alligator sinensis	AAN84922
1Tersina viridis	AAM70784
1Chlorospingus canigularis	AAM70673
1Zonotrichia capensis	AF382984_2
1Paroaria coronata	AAM70739
1Atlapetes schistaceus	AAM70646
1Emberiza flaviventris	AAM70691
1Conirostrum bicolor	AF382986_2
1Conirostrum albifrons	AAM70676
1Conirostrum sitticolor	AF382961_2
1Diglossa carbonaria	AAM70682
1Junco hyemalis	AAM70721
1Calamospiza melanocorys	AAM70655
1Aimophila cassinii	AAM70643
1Melanospiza richardsoni	ABU52019
1Loxigilla portoricensis	ABU52015
1Loxigilla portoricensis	ABU52017
1Crassostrea sikamea	ACO40207
1Icteria virens	AF382989_2
1Icteria virens	AAM70715
1Crassostrea angulata	ACO40195
1Crassostrea hongkongensis	ACO40171
1Crassostrea iredalei	ACO40219
1Seriphus politus	ACV95892
1Ichthyophis bannanicus	AAT07878
1Hexanematichthys sagor	ACN11806
1Hexanematichthys sagor	ACN11804
1Hexanematichthys sagor	ACN11802
1Dischistodus melanotus	AAP75352
1Tetraodon nigroviridis	ATP6_TETNG
1Amblyglyphidodon curacao	AAP75308
1Stegastes planifrons	AAP75470
1Halichoeres melanurus	AAP75474
1Plectroglyphidodon dickii	AAP75394
1Abudefduf sparoides	AAP75290
1Pomacentrus lepidogenys	AAP75426
1Pomacentrus grammorhynchus	AAP75422
1Chromis viridis	AAP75258
1Chromis atripectoralis	AAP75214
1Neoglyphidodon polyacanthus	AAP75370
1Chromis xanthopterygia	AAP75266
1Pomacentrus adelus	AAP75402
1Pomacentrus trilineatus	AAP75462
1Amphiprion clarkii	AAP75170
1Amphiprion ocellaris	AAP75180
1Amphiprion ocellaris	AAP75182
1Pomacentrus vaiuli	AAP75466
1Pomacentrus philippinus	AAP75452
1Amphilophus rhytisma	AAP75476
1Pomacentrus reidi	AAP75456
1Hemiglyphidodon plagiometopon	AAP75356
1Neoglyphidodon nigroris	AAP75366
1Plectroglyphidodon leucozonus	AAP75398
1Oncorhynchus clarkii henshawi	AAW67148
1Salmo salar	ATP6_SALSA
1Amblyglyphidodon aureus	AAP75304
1Pomacentrus chrysurus	AAP75414
1Pomacentrus milleri	AAP75432
1Pomacentrus nagasakiensis	AAP75440
1Embiotoca lateralis	AAP75472
1Abudefduf saxatilis	AAP75282
1Abudefduf bengalensis	AAP75270
1Abudefduf vaigiensis	AAP75296
1Abudefduf declivifrons	AAP75274
1Abudefduf troschelii	AAP75294
1Abudefduf vaigiensis	AAP75298
1Abudefduf notatus	AAP75280
1Abudefduf whitleyi	AAP75300
1Thunnus alalunga	BAD06497
1Katsuwonus pelamis	BAD06484
1Parma oligolepis	AAP75390
1Amblyglyphidodon curacao	AAP75306
1Pomacentrus coelestis	AAP75418
1Pomacentrus coelestis	AAP75416
1Arapaima gigas	ABQ11855
1Heterotis niloticus	ACP04276
1Chromis chromis	AAP75222
1Amblyglyphidodon leucogaster	AAP75312
1Pomacentrus lepidogenys	AAP75424
1Polypterus ornatipinnis	ATP6_POLOR
1Abudefduf taurus	AAP75292
1Acanthochromis polyacanthus	AAP75198
1Acanthochromis polyacanthus	AAP75200
1Rhaphiodon vulpinus	ACS34756
1Gadus morhua	ATP6_GADMO
1Bagre bagre	AAT91102
1Triclaria malachitacea	ABA19332
1Pyrrhura leucotis	ABA19359
1Pionopsitta pileata	AAT76823
1Pionopsitta pileata	ABA19314
1Cacatua goffini	ABA19323
1Amazona ochrocephala auropalliata	AAP32366
1Brotogeris chiriri	ABA19341
1Bufo melanostictus	AAT07852
1Bufo gargarizans	ABB72533
1Bufo japonicus	BAF81498
1Puntius titteya	AF287411_1
1Barbus serra	AF287461_1
1Cynoscion acoupa	ACV95868
1Cynoscion praedatorius	ACV95881
1Cynoscion arenarius	ACV95877
1Cynoscion nothus	ACV95879
1Cynoscion squamipinnis	ACV95882
1Isopisthus remifer	ACV95890
1Cynoscion othonopterus	ACV95880
1Cynoscion leiarchus	ACV95872
1Isopisthus remifer	ACV95889
1Cynoscion phoxocephalus	ACV95883
1Cynoscion virescens	ACV95871
1Cynoscion jamaicensis	ACV95869
1Atractoscion nobilis	ACV95891
1Cynoscion guatucupa	ACV95884
1Nebris microps	ACV95895
1Cynoscion nebulosus	ACV95886
1Cynoscion parvipinnis	ACV95873
1Cynoscion xanthulus	ACV95875
1Cynoscion albus	ACV95874
1Cynoscion microlepidotus	ACV95870
1Cynoscion analis	ACV95885
1Nebris occidentalis	ACV95894
1Nemapteryx augusta	ACN11886
1Notarius grandicassis	AAT91100
1Carasobarbus canis	AF288484_2
1Carasobarbus canis	AF288485_2
1Chrysiptera rollandi	AAP75342
1Epigonichthys maldivensis	BAD72158
1Sabanejewia romanica	AAL29542
1Sabanejewia vallachica	AAL29610
1Sabanejewia balcanica	AAL29570
1Sabanejewia baltica	AAL29550
1Thanatephorus cucumeris	ABC66224
1Verticillium dahliae	AAS68621
1Thanatephorus cucumeris	ACJ67221
1Galeichthys ater	ACM50360
1Potamosilurus latirostris	ACN11898
1Genidens machadoi	ACN11662
1Cobitis sinensis	YP_271994
1Barbus caninus	AF287369_2
1Barbus petenyi	AF287396_2
1Alouatta seniculus macconnelli	AAL50145
1Alouatta seniculus macconnelli	AAL50143
1Polypedates megacephalus	AAT68486
1Apis mellifera ligustica	ATP6_APILI
1Laqueus rubellus	BAA95918
1Acestrorhynchus falcirostris	ACS34735
1Aedes albopictus	ATP6_AEDAL
1Caecilius quercus	AAO83385
1Anopheles gambiae	ATP6_ANOGA
1Aedes aegypti	ATP6_AEDAE
1Anopheles quadrimaculatus	ATP6_ANOQU
1Pongo pygmaeus	ATP6_PONPY
1Hylobates pileatus	BAJ04753
1Didelphis virginiana	ATP6_DIDMA
1Petaurus breviceps	BAE93998
1Lagorchestes hirsutus	BAE94011
1Distoechurus pennatus	BAE93959
1Vombatus ursinus	CAC83110
1Ornithorhynchus anatinus	ATP6_ORNAN
1Balaenoptera musculus	ATP6_BALMU
1Balaenoptera physalus	ATP6_BALPH
1Dactylopsila trivirgata	BAE93985
1Canis lupus familiaris	ATP6_CANFA
1Pan paniscus	ATP6_PANPA
1Pan troglodytes	ATP6_PANTR
1Symphalangus syndactylus	BAJ04766
1Nomascus siki	BAJ04779
1Hylobates agilis	BAJ04740
1Dasypus novemcinctus	ATP6_DASNO
1Equus asinus	ATP6_EQUAS
1Phoca vitulina	ATP6_PHOVI
1Equus caballus	ATP6_HORSE
1Homo sapiens	AAL54649
1Homo sapiens	AAN14959
1Homo sapiens	AAK17810
1Homo sapiens	AAL54805
1Homo sapiens	ABS84061
1Homo sapiens	AAL54597
1Homo sapiens	AAK17836
1Homo sapiens	ABS84035
1Homo sapiens	AAR17477
1Homo sapiens	ATP6_HUMAN
1Homo sapiens	AF368271_1
1Homo sapiens	AAL54623
1Homo sapiens	AAN14926
1Homo sapiens	AAN14772
1Homo sapiens	AAK17719
1Homo sapiens	AAN14717
1Homo sapiens	AAL54610
1Gorilla gorilla gorilla	ATP6_GORGO
1Homo sapiens	AAN14948
1Homo sapiens	AAN14827
1Homo sapiens	AAK17576
1Sus scrofa	ADT71729
1Sus scrofa	ADT71731
1Sus scrofa	ATP6_PIG
1Sus scrofa	ADD52030
1Homo sapiens	AAL54480
1Bos grunniens	ATP6_BOSMU
1Cervus elaphus	BAE66705
1Ovis aries	ATP6_SHEEP
1Procapra przewalskii	ADB81000
1Tachyglossus aculeatus aculeatus	ATP6_TACAC
1Hippopotamus amphibius	ATP6_HIPAM
1Lemur catta	ATP6_LEMCA
1Ictidomys tridecemlineatus	ATP6_SPETR
1Mus musculus	ATP6_MOUSE
1Rhinolophus formosae	ABW20497
1Acinonyx jubatus	AAR19072
1Lama glama	ABY71255
1Vicugna vicugna	ABY71257
1Vicugna pacos	ABY71254
1Lama guanicoe	ABY71256
1Microtus levis	AAY30376
1Rattus norvegicus	ATP6_RAT
1Camelus dromedarius	ABY71259
1Camelus bactrianus	ABY71258
1Rangifer tarandus	BAE66692
1Bos indicus	ATP6_BOSIN
1Felis catus	ATP6_FELCA
1Rhinoceros unicornis	ATP6_RHIUN
1Halichoerus grypus	ATP6_HALGR
1Neofelis nebulosa	ABB22885
1Homo sapiens	AAN14750
1Macropus robustus	ATP6_MACRO
1Phalanger vestitus	BAE94024
1Oryctolagus cuniculus	ATP6_RABIT
1Anomalurus sp. GP-2005	CAJ43817
1Cricetulus griseus	ATP6_CRIGR
1Hylobates lar	ATP6_HYLLA
1Ceratotherium simum	ATP6_CERSI
1Homo sp. Altai	CBX25811
1Pantholops hodgsonii	ABA03256
1Capra hircus	ATP6_CAPHI
1Dugong dugon	ATP6_DUGDU
1Bos taurus	ATP6_BOVIN
1Papio hamadryas	ATP6_PAPHA
1Pongo abelii	ATP6_PONAB
1Phascolarctos cinereus	BAE93972
1Xenopus laevis	ATP6_XENLA
1Cebus capucinus	AAL50183
1Ateles geoffroyi panamensis	AAL50175
1Ateles geoffroyi yucatanensis	AAL50169
1Ateles geoffroyi yucatanensis	AAL50173
1Ateles sp.	AAL50177
1Ateles geoffroyi yucatanensis	AAL50171
1Alouatta pigra	AAL50137
1Alouatta seniculus seniculus	AAL50139
1Alouatta sara	AAL50141
1Alouatta belzebul belzebul	AAL50159
1Alouatta belzebul belzebul	AAL50155
1Alouatta belzebul belzebul	AAL50165
1Alouatta belzebul belzebul	AAL50161
1Alouatta belzebul belzebul	AAL50163
1Alouatta palliata palliata	AAL50129
1Alouatta palliata aequatorialis	AAL50133
1Alouatta caraya	AAL50149
1Alouatta guariba	AAL50151
1Brachyteles arachnoides	AAL50179
1Brachyteles arachnoides	AAL50181
1Alouatta belzebul belzebul	AAL50157
1Aotus trivirgatus	AAP33893
1Podarcis muralis	AAY18752
1Podarcis siculus	AAY18761
1Dinodon semicarinatus	ATP6_DINSE
1Barbus calidus	AF287458_1
1Barbus calidus	AF287459_1
1Barbus serra	AF287460_1
1Barbus cyclolepis cyclolepis	AF287372_2
1Barbus cyclolepis cholorematicus	AF287371_2
1Barbus sperchiensis	AF287373_2
1Barbus cyclolepis cholorematicus	AF287370_2
1Barbus sperchiensis	AF287374_2
1Thanatephorus cucumeris	ABC66221
1Ceratobasidium sp. CS01_6	ACJ67215
1Ceratobasidium sp. CS02_4	ACJ67206
1Malurus leucopterus leucopterus	AAP15319
1Malurus leucopterus leucopterus	AAP15315
1Malurus leucopterus leucopterus	AAP15320
1Acestrorhynchus falcirostris	ACS34733
1Phthonandria atrilineata	AAZ66740
1Saturnia japonica	AAZ66742
1Actias selene ningpoana	AAT69558
1Parnassius bremeri	ACO83376
1Ochrogaster lunifer	YP_002122316
1Locusta migratoria	ATP6_LOCMI
1Alligator mississippiensis	ATP6_ALLMI
1Montastraea faveolata	BAE16247
1Saccostrea mordax	ACO40237
1Geastrum hariotii	ACJ37370
1Malurus leucopterus leucopterus	AAP15317
1Nectria sp. CBS 478.75	ABS88111
1Thanatephorus cucumeris	ACJ67226
1Elaphocordyceps subsessilis	ABS88089
1Ceratobasidium sp. CBS 758.79	ABC66215
1Nasonia vitripennis	ACH85768
1Nasonia vitripennis	ACH85772
1Nasonia vitripennis	ACH85828
1Nasonia vitripennis	ACH81733
1Nasonia longicornis	ACH85712
1Nasonia longicornis	ACH85744
1Nasonia longicornis	ACH85704
1Nasonia longicornis	ACH85692
1Nasonia longicornis	ACH85732
1Nasonia longicornis	ACH85736
1Nasonia longicornis	ACH85720
1Nasonia longicornis	ACH85728
1Nasonia giraulti	ACH85668
1Nasonia giraulti	ACH85680
1Philotrypesis sp. _colon1_	ACD70308
1Philotrypesis sp. _colon2_	ACD70313
1Trichomalopsis sp. DCSGO-2008	ACH85840
1Trichomalopsis dubius	ACH85832
1Trichomalopsis sarcophagae	ACH85836
1Ostrinia nubilalis	AAL66242
1Eremobates cf. palpisetulosus SEM-2008	ACA49838
1Eriocheir japonica	ACJ44953
1Eriocheir sinensis	ACJ44979
1Phalangium opilio	ACA66082
1Drosophila melanogaster	ATP6_DROME
1Drosophila sechellia	ATP6_DROSE
1Drosophila yakuba	ATP6_DROYA
1Drosophila simulans	ATP6_DROSI
1Drosophila mauritiana	ATP6_DROMA
1Euphausia superba	ACH78208
1Basileuterus rivularis	AAQ62801
1Lepidopsocidae sp. RS-2001	AAP44718
1Ceratosolen solmsi	ACD70316
1Crassostrea ariakensis	ACO40183
1Oreochromis mossambicus	YP_272020
1Gephyrocharax sp. DC-2004	ACS34754
1Nasonia giraulti	ACH85660
1Malurus leucopterus leucopterus	AAP15318
1Malurus leucopterus leuconotus	AAP15321
1Armillaria mellea	ADG37668
1Armillaria mellea	ADG37666
1Aschersonia badia	ABS88071
1Ceratobasidium sp. CBS 133.82	ABC66210
1Thanatephorus cucumeris	ABC66218
1Hemiarius stormii	ACN11794
1Cobitis bilineata	ABV68581
1Cobitis sp. MP-2007b	ABV68593
1Cobitis dalmatina	ABV68585
1Cobitis narentana	ABV68583
1Cobitis sp. MP-2007a	ABV68587
1Cobitis elongata	ABV68589
1Cobitis elongata	ABV68591
1Cobitis elongatoides	ABV68575
1Cobitis elongatoides	ABV68577
1Cobitis elongatoides	ABV68597
1Sabanejewia balcanica	ABU96546
1Sabanejewia balcanica	ABU96542
1Sabanejewia balcanica	ABU96534
1Sabanejewia balcanica	ABU96548
1Wiebesia sp. DWH-2008	ACD70305
1Mastigoproctus giganteus	ACA51961
1Pristomyrmex punctatus	BAJ53364
1Armadillidium vulgare	ABR12823
1Rhodospirillum centenum SW	YP_002296622
1Oncorhynchus mykiss	ATP6_ONCMY
1Equus caballus	ABC55744
1Equus caballus	ABC55746
1Equus caballus	ABC55747
1Equus caballus	ABC55745
1Equus caballus	ABC55743
1Phallobata alba	ABI97667
1Geastrum sp. KH-NZ06-135	ACJ37381
1Geastrum sp. Trappe 26298	ACJ37376
1Geastrum sp. KH-NZ06-006	ACJ37379
1Geastrum sp. KH-NC04-007	ACJ37378
1Radiigera taylorii	ABI97541
1Radiigera fuscogleba	ABI97634
1Geastrum recolligens	ABI97507
1Geastrum pectinatum	ABI97626
1Geastrum sp. MCA1723	ACJ37375
1Geastrum subiculosum	ACJ37372
1Geastrum smardae	ABI97628
1Geastrum sp. KH-06182003-7	ACJ37377
1Geastrum sp. KH-NZ06-052	ACJ37380
1Geastrum rufescens	ABI97627
1Geastrum sp. BR339380/95	ACJ37374
1Radiigera bushnellii	ABI97632
1Malurus leucopterus leucopterus	AAP15312
1Malurus lamberti	AAP15337
1Malurus leucopterus leuconotus	AAP15334
1Malurus leucopterus leuconotus	AAP15330
1Malurus leucopterus leuconotus	AAP15331
1Verticillium epiphytum	ABS88124
1Abies sachalinensis	ACM46758
1Cathorops spixii	ACN11648
1Notarius aff. kessleri RB-2009	ACN11670
1Achelia bituberculata	AAS18909
1Vollenhovia yambaru	BAJ41531
1Vollenhovia okinawana	BAJ41536
1Lithobius forficatus	AF309492_4
1Phrynus sp. 1 SEM-2008	ACA49826
1Elephas maximus	ATP6_ELEMA
1Mammuthus primigenius	ATP6_MAMPR
1Loxodonta africana	ATP6_LOXAF
1Picus viridis karelini	ADF32909
1Picus viridis karelini	ADF32907
1Picus viridis sharpei	ADF32906
1Selaginella moellendorffii	AEA11201
1Armillaria mellea	ADG37664
1Triglochin striata	ADM89617
1Ramaria sp. OSC 122865	ABI97646
1Ramaria celerivirescens	ABI97644
1Ramaria sp. OSC 122872	ABI97649
1Gomphus clavatus	ABI97508
1Gautieria sp. OSC122685	ABI97639
1Gautieria pterosperma	ABI97637
1Ramaria sp. OSC 122871	ABI97647
1Ramaria botrytis	ABI97643
1Gautieria sp. OSC61517	ABI97636
1Gautieria crispa	ABI97505
1Turbinellus floccosus	AAD02902
1Malurus leucopterus leuconotus	AAP15335
1Cephalocassis borneensis	ACN11798
1Acestrorhynchus nasutus	ACS34751
1Uroctonus mordax	ACA62673
1Buthus occitanus	ACA66069
1Hypochilus thorelli	ACA62647
1Solenopsis invicta	ADP01813
1Solenopsis invicta	ADP01787
1Solenopsis richteri	ADP01800
1Rhipicephalus sanguineus	ATP6_RHISA
1Tetraclita japonica	BAD20517
1Megabalanus volcano	BAD44763
1Caenorhabditis elegans	BAD44740
1Solenopsis geminata	ADP01774
1Aphonopelma sp. 1 SEM-2008	ACA62660
1Silene vulgaris	ABD90655
1Silene vulgaris	ABD90654
1Xerocomus chrysenteron	AAD02899
1Boletus pallidus	AAD02898
1Chamonixia sp. Muroi361	ABI97622
1Phylloporus rhodoxanthus	AAD26669
1Chamonixia caespitosa	AAD26670
1Hysterangium sp. H2022	ABI97593
1Hysterangium aggregatum	ABI97510
1Hysterangium sp. MEL2049882	ABI97581
1Geastrum saccatum	ACJ37371
1Thanatephorus cucumeris	ACJ67219
1Geastrum sp. T26588	ABI97629
1Ceratobasidium sp. AG-O	ABC66208
1Varroa destructor	AAN87156
1Mesobuthus gibbosus	CAG30056
1Unionicola foili	ACF19639
1Unionicola parkeri	ADP01827
1Nephila clavata	AAS15723
1Latimeria chalumnae	ATP6_LATCH
1Malurus leucopterus edouardi	AAP15303
1Malurus leucopterus leuconotus	ADQ27935
1Phallogaster saccatus	ABI97619
1Gautieria sp. OSC48137	ABI97638
1Gallacea eburnea	ABI97503
1Oncorhynchus masou	ATP6_ONCMA
1Malurus leucopterus leucopterus	AAP15314
1Amytornis striatus	AEK12206
1Stipiturus mallee	AEK12205
1Malurus splendens melanotus	AEK12202
1Malurus splendens musgravi	AEK12201
1Malurus leucopterus leuconotus	AAP15325
1Malurus pulcherrimus	AEK12200
1Malurus amabilis	AEK12194
1Sipodotus wallacii	AEK12204
1Clytomyias insignis oorti	AEK12203
1Malurus elegans	AEK12197
1Malurus leucopterus leuconotus	AAP15326
1Malurus leucopterus leuconotus	AAP15336
1Geastrum subiculosum	ACJ37373
1Geastrum floriforme	ABI97506
1Artemia franciscana	ATP6_ARTSF
1Primeuchroeus sp. M48	ABB96388
1Habronattus oregonensis	AAT02498
1Stachybotrys chartarum	AAS68594
1Hypocrea rufa	AAS68608
1Melanopsamma pomiformis	AAS68591
1Chalciporus piperatoides	AAD26671
1Ceratobasidium sp. CBS 154.35	ABC66212
1Lysurus borealis	ABI97666
1Aroramyces sp. OSC122858	ABI97550
1Clavariadelphus sp. OSC122861	ABI97635
1Gelopellis sp. MEL2063389	ABI97658
1Aseroe rubra	ABI97651
1Anthurus archeri	ABI97650
1Aroramyces sp. SM10030	ABI97552
1Austrogautieria clelandii	ABI97554
1Austrogautieria sp. OSC80139	ABI97500
1Gummiglobus joyceae	ABI97509
1Hysterangium sp. T26367	ABI97611
1Hysterangium sp. T13345	ABI97609
1Sclerogaster sp. KH-NZ06-210	ACJ37386
1Sclerogaster compactus	ACJ37382
1Sclerogaster sp. Trappe 15701	ACJ37384
1Austrogautieria manjimupana	ABI97499
1Castoreum sp. OSC122814	ABI97558
1Protubera sp. T20068	ABI97620
1Hysterangium gardneri	ABI97572
1Hysterangium coriaceum	ABI97570
1Hysterangium sp. T27921	ABI97612
1Austrogautieria sp. Beaton66	ABI97557
1Austrogautieria sp. OSC122637	ABI97556
1Austrogautieria clelandii	ABI97553
1Gallacea sp. OSC122728	ABI97565
1Gallacea sp. REB2364	ABI97562
1Hysterangium sp. T6923	ABI97592
1Hysterangium sp. MEL2057692	ABI97585
1Chondrogaster pachysporus	ABI97560
1Andebbia pachythrix	ABI97545
1Chondrogaster angustisporus	ABI97559
1Gallacea sp. OSC122813	ABI97566
1Hysterangium strobilus	ABI97525
1Gallacea dingleyae	ABI97561
1Austrogautieria sp. OSC80140	ABI97501
1Austrogautieria chlorospora	ABI97498
1Hysterangium sp. OSC122860	ABI97597
1Hysterangium sp. T17856	ABI97594
1Hysterangium fragile	ABI97517
1Hysterangium epiroticum	ABI97516
1Hysterangium coriaceum	ABI97571
1Gummiglobus agglutinosporus	ABI97567
1Hysterangium sp. H5057	ABI97599
1Malajczukia ingratissima	ABI97530
1Mesophellia sabulosa	ABI97616
1Mesophellia trabalis	ABI97617
1Hysterangium sp. MEL2078287	ABI97580
1Hysterangium sp. H6105	ABI97601
1Hysterangium sp. OSC122483	ABI97604
1Hysterangium sp. T26347	ABI97610
1Hysterangium sp. H5573	ABI97600
1Hysterangium sp. AHF602	ABI97591
1Aroramyces sp. T9930	ABI97549
1Aroramyces gelatinosporus	ABI97546
1Hysterangium sp. SM10100	ABI97607
1Hysterangium sp. SM10166	ABI97608
1Aroramyces radiatus	ABI97547
1Aroramyces sp. OSC122590	ABI97551
1Aroramyces sp. T15013	ABI97548
1Nothocastoreum cretaceum	ABI97618
1Hysterangium sp. SM10007	ABI97606
1Hysterangium sp. PDD82853	ABI97605
1Hysterangium affine	ABI97568
1Hysterangium sp. OSC59629	ABI97590
1Phaeoclavulina sp. OSC122874	ABI97642
1Trappea phillipsii	ABI97544
1Hysterangium sp. OSC122859	ABI97596
1Hysterangium clathroides	ABI97569
1Protubera jamaicensis	ABI97670
1Protubera sabulonensis	ABI97672
1Dictyophora multicolor	ABI97655
1Phallus costatus	ABI97534
1Gelopellis purpurascens	ABI97676
1Phallus ravenelii	ABI97536
1Dictyophora duplicata	ABI97502
1Protubera sp. SM10143	ABI97673
1Protubera sp. JM98/351	ABI97674
1Protubera canescens	ABI97669
1Clathrus chrysomycelinus	ABI97652
1Clathrus ruber	ABI97653
1Laternea triscapa	ABI97665
1Protubera parvispora	ABI97671
1Lysurus mokusin	ABI97528
1Simblum sphaerocephalum	ABI97543
1Protubera hautuensis	ABI97538
1Gallacea sp. T25038	ABI97563
1Gloeocantharellus sp. OSC122875	ABI97640
1Ramaria stricta	ABI97542
1Gelopellis sp. H4571	ABI97657
1Phaeoclavulina grandis	ABI97641
1Sclerogaster minor	ACJ37383
1Hysterangium sp. OSC122836	ABI97602
1Hysterangium sp. OSC122721	ABI97603
1Hysterangium sp. H4749	ABI97598
1Hysterangium sp. T6889	ABI97595
1Schenella simplex	ABI97631
1Trappea darkeri	ABI97675
1Trappea pinyonensis	ABI97621
1Sicydium buscki	ACR24073
1Sicydium buscki	ACR24098
1Sicydium buscki	ACR24091
1Sicydium buscki	ACR24110
1Sicydium buscki	ACR24047
1Sicydium buscki	ACR24119
1Sicydium buscki	ACR24043
1Sicydium sp. BDC-2009	ACR24039
1Sicydium sp. BDC-2009	ACR24006
1Sicydium punctatum	ACR23999
1Sicydium punctatum	ACR24000
1Sicydium sp. BDC-2009	ACR24038
1Sicydium sp. BDC-2009	ACR24025
1Sicydium sp. BDC-2009	ACR24012
1Sicydium punctatum	ACR23995
1Sicydium sp. BDC-2009	ACR24040
1Helianthus annuus	CAA57786
1Viridispora diparietispora	AAS68618
1Pseudonectria rousseliana	AAS68619
1Sicydium buscki	ACR24087
1Alouatta pigra	ABK27486
1Alouatta palliata	ABK27552
1Thrips imaginis	AAN64186
1Heterodoxus macropus	AF270939_12
1Rhizanthes lowii	ACJ70650
1Rhizanthes infanticida	ACJ70651
1Rhizanthes deceptor	ACJ70652
1Larix sibirica	ACM46790
1Hysterangium sp. T8997	ABI97613
1Malurus leucopterus leucopterus	AAP15313
1Malurus leucopterus leuconotus	AAP15324
1Ramaria sp. OSC 122873	ABI97648
1Dictyophora indusiata	ABI97654
1Hysterangium pompholyx	ABI97520
1Hysterangium sp. T22832	ABI97587
1Hysterangium sp. T3296	ABI97579
1Hysterangium sp. K and G Beaton	ABI97527
1Hysterangium sp. T591	ABI97577
1Hysterangium youngii	ABI97526
1Hysterangium sp. T3328	ABI97589
1Hysterangium sp. H4123	ABI97582
1Hysterangium hallingii	ABI97518
1Hysterangium sp. T19263	ABI97586
1Hysterangium rupticutis	ABI97575
1Hysterangium calcareum	ABI97513
1Hysterangium sp. T17501	ABI97578
1Hysterangium cistophilum	ABI97514
1Hysterangium setchellii	ABI97576
1Phallus hadriani	ABI97535
1Hysterangium neotunicatum	ABI97574
1Acestrorhynchus microlepis	ACS34745
1Acestrorhynchus microlepis	ACS34747
1Pelamis platurus	ACV83609
1Homalodisca vitripennis	AAW69409
1Trialeurodes vaporariorum	AAU14224
1Hemiaspis damelii	ACV83515
1Aipysurus duboisii	ACV83521
1Emydocephalus annulatus	ACV83539
1Emydocephalus annulatus	ACV83535
1Laticauda laticaudata	ACV83513
1Enhydrina schistosa	ACV83569
1Disteira kingii	ACV83563
1Lapemis curtus	ACV83605
1Leioselasma elegans	ACV83577
1Hydrophis mcdowelli	ACV83583
1Hydrophis ornatus	ACV83589
1Lapemis curtus	ACV83599
1Leioselasma pacifica	ACV83591
1Leioselasma cyanocincta	ACV83575
1Aipysurus fuscus	ACV83523
1Aipysurus eydouxi	ACV83527
1Aipysurus apraefrontalis	ACV83517
1Aipysurus laevis	ACV83531
1Aipysurus laevis	ACV83533
1Parahydrophis mertoni	ACV83549
1Laticauda frontalis	ACV83509
1Laticauda laticaudata	ACV83511
1Astrotia stokesii	ACV83553
1Astrotia stokesii	ACV83551
1Hydrophis ornatus	ACV83587
1Acalyptophis peronii	ACV83559
1Hydrophis lapemoides	ACV83579
1Schizaphis graminum	AAS00818
1Rhopalosiphum padi	ATP6_RHOPD
1Nemapteryx augusta	ACN11888
1Picus mentalis	ACE74368
1Xanthotis flaviventer	AEK12208
1Malurus leucopterus edouardi	AAP15308
1Malurus leucopterus leuconotus	AAP15328
1Malurus leucopterus edouardi	AAP15307
1Silene vulgaris	ACA35042
1Hysterangium album	ABI97511
1Malurus leucopterus leuconotus	AAP15333
1Melampsora populnea f. sp. pinitorqua	ACR44312
1Hysterangium sp. Garcia3779	ABI97584
1Ramaria flavobrunnescens	ABB36658
1Stachybotrys echinata	AAS68620
1Ceratobasidium sp. CBS 572.83	ABC66214
1Torrubiella wallacei	ABS89002
1Acestrorhynchus lacustris	ACS34743
1Bemisia tabaci	AAU14196
1Tetraleurodes acaciae	AAU14152
1Gluconacetobacter hansenii ATCC 23769	ZP_06832900
1Daktulosphaira vitifoliae	AAZ08219
1Micropechis ikaheka	ACV83505
1Ephalophis greyae	ACV83543
1Hydrelaps darwiniensis	ACV83547
1Acalyptophis peronii	ACV83557
1Ustilago cynodontis	ABK34551
1Rafflesia rochussenii	ACJ70636
1Rafflesia tuan-mudae	ACJ70648
1Rafflesia micropylora	ACJ70646
1Sapria himalayana	ACJ70635
1Rafflesia manillana	ACJ70649
1Hysterangium membranaceum	ABI97519
1Malurus melanocephalus	AAP15338
1Myrothecium verrucaria	AAS68595
1Myrothecium cinctum	AAS68592
1Thanatephorus cucumeris	ABC66220
1Boletus edulis	AAD02897
1Hysterangium salmonaceum	ABI97522
1Stachybotrys subsimplex	AAS68593
1Isaria farinosa	ABS88100
1Glomerella cingulata	ABS88093
1Pelamis platurus	ACV83607
1Leioselasma czeblukovi	ACV83573
1Leioselasma pacifica	ACV83593
1Aipysurus eydouxi	ACV83529
1Leioselasma pacifica	ACV83595
1Disteira major	ACV83567
1Hydrelaps darwiniensis	ACV83545
1Disteira major	ACV83565
1Malurus leucopterus leuconotus	AAP15332
1Sporisorium scitamineum	ABC42038
1Pseudozyma prolifica	ABC42040
1Sporisorium sorghi	ABC42037
1Ustilago hordei	ABC42041
1Coltricia perennis	ACA63376
1Cotylidia sp. MB5	ACA63351
1Hysterangium aureum	ABI97512
1Austrogautieria manjimupana	ABI97555
1Hysterangium spegazzinii	ABI97524
1Hysterangium rugisporum	ABI97521
1Hyphodontia alutaria	ACA63359
1Phyllotopsis sp. MB35	ACA63365
1Schizophyllum commune	ACA63371
1Acanthorhynchus superciliosus	AEK12207
1Balansia henningsiana	AAS68597
1Henningsomyces candidus	ACA63369
1Geastrum fimbriatum	ABI97624
1Albinaria caerulea	ATP6_ALBCO
1Aipysurus fuscus	ACV83525
1Ochronectria calami	AAS68598
1Hysterangium inflatum	ABI97573
1Malurus cyaneus cyanochlamys	AEK12195
1Neolamprologus fasciatus	ACN67208
1Hydrophis lapemoides	ACV83581
1Hexanematichthys sagor	ACN11808
1Lepidiolamprologus profundicola	ACN67204
1Neolamprologus leloupi	ACN67218
1Neolamprologus brevis	ACN67244
1Neolamprologus leloupi	ACN67216
1Variabilichromis moorii	ACN67224
1Neolamprologus modestus	ACN67222
1Neolamprologus savoryi	ACN67226
1Lamprologus callipterus	ACN67182
1Neolamprologus fasciatus	ACN67214
1Neolamprologus multifasciatus	ACN67118
1Lamprologus callipterus	ACN67188
1Lamprologus ocellatus	ACN67200
1Neolamprologus tretocephalus	ACN67230
1Neolamprologus cf. meeli/boulengeri BN-2008	ACN67236
1Lamprologus ornatipinnis	ACN67240
1Lamprologus ornatipinnis	ACN67238
1Neolamprologus modestus	ACN67220
1Lamprologus ocellatus	ACN67202
1Julidochromis ornatus	ACN67124
1Neolamprologus tetracanthus	ACN67228
1Lamprologus cf. ocellatus BN-2009	ACN67232
1Lamprologus ocellatus	ACN67198
1Lepidiolamprologus cunningtoni	ACN67190
1Isaria tenuipes	ABS88102
1Gallacea sp. OSC80855	ABI97564
1Rhopalogaster transversarium	ABI97623
1Truncocolumella citrina	AAD26687
1Suillus granulatus	AAD02893
1Suillus variegatus	AAD02896
1Auriporia aurea	ACA63348
1Russula rosacea	AAD02904
1Peniophora nuda	ACA63364
1Tapinella atrotomentosa	AAD26674
1Albatrellus syringae	ACA63346
1Stereum hirsutum	ACA63373
1Echinodontium tinctorium	ACA63355
1Meripilus giganteus	ACA63362
1Sarcodon imbricatus	ACA63345
1Ceriporia purpurea	ACA63350
1Spongipellis pachyodon	ACA63374
1Alpova olivaceotinctus	AAD26688
1Brauniellula albipes	AAD26689
1Serpula himantioides	AAD26676
1Phlebopus portentosus	AAD26679
1Hygrophoropsis aurantiaca	AAD26677
1Trametes cinnabarina	ACA63368
1Dentocorticium sulphurellum	ACA63354
1Trametes versicolor	ACA63375
1Scleroderma laeve	AAD26683
1Pisolithus arhizus	AAD26682
1Gyroporus cyanescens	AAD26685
1Scleroderma hypogaeum	AAD26684
1Paxillus filamentosus	AAD26672
1Paxillus involutus	AAD26673
1Gyrodon lividus	AAD26681
1Tapinella panuoides	AAD26675
1Boletinellus merulioides	AAD26680
1Simplicillium lanosoniveum	ABS88119
1Lecanicillium psalliotae	ABS88104
1Cyphocharax magdalenae	AF412931_2
1Nemapteryx nenga	ACN11812
1Arius sp. A RB-2009	ACN11780
1Myrothecium inundatum	AAS68615
1Tropidurus hispidus	ATP6_TROHI
1Tropidurus montanus	ATP6_TROMO
1Ceratobasidium sp. CBS 569.83	ABC66213
1Bionectria pityrodes	AAS68610
1Cordyceps cardinalis	ABS88080
1Hypocrea lutea	AAS68613
1Hypocrella nectrioides	ABS88099
1Beauveria caledonica	ABS88074
1Cordyceps tuberculata	ABS88091
1Elaphocordyceps capitata	AAS68602
1Malurus leucopterus leucopterus	AAP15316
1Halocynthia roretzi	BAA88261
1Aipysurus duboisii	ACV83519
1Hydrophis mcdowelli	ACV83585
1Cordyceps confragosa	ABS88122
1Picus vaillantii	ADF32911
1Polyporus varius	ACA63367
1Cordyceps cardinalis	ABS88081
1Elaphocordyceps japonica	ABS88084
1Metacordyceps chlamydosporia	ABS88082
1Elaphocordyceps ophioglossoides	AAS68604
1Ganoderma tsugae	ACA63357
1Rhodobacteraceae bacterium HTCC2150	ZP_01740790
1Ciona intestinalis	NP_758769
1Shimizuomyces paradoxus	ABS88117
1Niesslia exilis	AAS68601
1Coniophora arida	AAD26678
1Aschersonia placenta	ABS88072
1Abies sibirica	ACM46757
1Epichloe typhina	AAS68605
1Stephanonectria keithii	AAS68609
1Malurus leucopterus leucopterus	AAP15311
1Anaplasma marginale str. Puerto Rico	ZP_05278459
1Elaphocordyceps fracta	ABS88083
1Gallinago gallinago faeroeensis	ACV40228
1Gallinago gallinago gallinago	ACV40229
1Gallinago nigripennis	ACV40230
1Gallinago gallinago gallinago	ACV40227
1Gallinago paraguaiae	ACV40231
1Arius madagascariensis	ACN11696
1Nemapteryx aff. nenga RB-2009	ACN11828
1Vasdavidius concursus	AAV40845
1Neolissochilus soroides	ABV44180
1Tor tambroides	ABV44204
1Tor khudree	ABV44214
1Neolissochilus stracheyi	ABV44178
1Tor douronensis	ABV44192
1Tor putitora	ABV44194
1Tor douronensis	ABV44238
1Tor douronensis	ABV44246
1Tor douronensis	ABV44240
1Tor douronensis	ABV44232
1Tor douronensis	ABV44220
1Tor douronensis	ABV44228
1Tor khudree	ABV44166
1Tor putitora	ABV44216
1Tor putitora	ABV44252
1Tor tambroides	ABV44208
1Tor putitora	ABV44254
1Tor tambroides	ABV44188
1Neolissochilus sp. 2 TTTN-2007	ABV44258
1Tor macrolepis	ABV44256
1Tor tambroides	ABV44184
1Neolissochilus hexagonolepis	ABV44198
1Schizothorax zarudnyi	ABV44236
1Thanatephorus cucumeris	ABC66228
1Antrodia carbonica	ACA63347
1Lenzites betulinus	ACA63361
1Metacordyceps taii	ABS88090
1Cordyceps cf. acicularis OSC 128580	ABS88077
1Cosmospora coccinea	AAS68617
1Hydropisphaera erubescens	ABS88097
1Dendrocorticium roseocarneum	ACA63360
1Dacrymyces chrysospermus	ACA63353
1Lecanicillium psalliotae	ABS88105
1Leptotrombidium pallidum	BAD99503
1Tor douronensis	ABV44186
1Niesslia exilis	AAS68599
1Lecanicillium antillanum	ABS88103
1Metarhizium flavoviride	ABS88109
1Russula compacta	ACA63370
1Haptocillium balanoides	ABS88094
1Neolamprologus brevis	ACN67242
1Heterobasidion annosum	ACA63358
1Simplicillium lanosoniveum	ABS88120
1Cryptoporus volvatus	ACA63352
1Amazona ochrocephala ochrocephala	ABE41928
1Amazona aestiva aestiva	ABE41926
1Amazona ochrocephala ochrocephala	ABE41948
1Amazona aestiva aestiva	ABE41920
1Amazona aestiva aestiva	ABE41908
1Amazona ochrocephala nattereri	ABE41914
1Amazona ochrocephala ochrocephala	ABE41936
1Amazona ochrocephala xantholaema	ABE41910
1Leptotrombidium deliense	BAE47100
1Leptotrombidium akamushi	BAE47113
1Metacordyceps chlamydosporia	ABS88113
1Hydropisphaera peziza	AAS68612
1Arius sp. A RB-2009	ACN11782
1Neolamprologus cf. meeli/boulengeri BN-2008	ACN67248
1Hypomyces polyporinus	AAS68614
1Cryptococcus neoformans var. neoformans	ABU51335
1Cryptococcus gattii	ABU51380
1Cryptococcus gattii	ABU51364
1Cryptococcus gattii	ABU51361
1Cryptococcus gattii	ABU51384
1Cryptococcus gattii	ABU51359
1Myrothecium leucotrichum	AAS68589
1Myrothecium roridum	AAS68590
1Nectriopsis violacea	AAS68600
1Stilbocrea macrostoma	AAS68607
1Ramaria moelleriana	ABI97645
1Doliolum nationalis	BAD86524
1Rafflesia hasseltii	ACJ70640
1Thecaphora amaranthi	ABK34549
1Ophiocordyceps sphecocephala	ABS88088
1Metarhizium anisopliae	ABS88108
1Isaria farinosa	ABS88101
1Metarhizium album	ABS88107
1Arius oetik	ACN11776
1Entoloma strictius	ACA63356
1Bondarzewia montana	ACA63349
1Polyporus melanopus	ACA63366
1Sphaerostilbella berkeleyana	ABS88121
1Hysterangium sp. T4794	ABI97583
1Shimizuomyces paradoxus	ABS88116
1Rotiferophthora angustispora	ABS88115
1Leuconectria clusiae	AAS68616
1Nemapteryx aff. nenga RB-2009	ACN11826
1Neolamprologus calliurus	ACN67252
1Gelopellis sp. H4397	ABI97656
1Toxocara canis	ACR38966
1Toxocara vitulorum	ACR38967
1Cooperia oncophora	AAO91755
1Haemonchus contortus	ABY64775
1Caenorhabditis briggsae	ATP6_CAEBR
1Caenorhabditis elegans	ATP6_CAEEL
1Lamprologus signatus	ACN67250
1Ascaris suum	ATP6_ASCSU

## Sheet: ATP 9 and c
ATP 9 and c
Organism Name	Accession Number
1Yarrowia lipolytica	AAA78262
1Colletotrichum gloeosporioides f. sp. aeschynomenes	CAC27323
1Ehrlichia ruminantium str. Gardel	YP_196805
1Homo sapiens	NP_001002258
1Homo sapiens	NP_001177258
1Ajellomyces capsulatus H88	EGC40629
1Aspergillus tubingensis	ABA62016
1Asplenium nidus	CAM82800
1Brassica oleracea	AAZ16249
1Candida castellii	CAX36932
1Candida frijolesensis	YP_004733522
1Candida maltosa	YP_003434116
1Candida metapsilosis	ACB37040
1Candida parapsilosis	NP_943642
1Candida sojae	YP_003434274
1Carthamus tinctorius	ABG66728
1Chaetomium thermophilum var. thermophilum DSM 1495	YP_004769781
1Cryptococcus neoformans var. grubii	AAN37581
1Cyberlindnera jadinii	CAA52876
1Cyberlindnera mrakii	CAA52875
1Cyberlindnera suaveolens	CAA54456
1Didymium iridis	ACZ96461
1Fusarium oxysporum	AAW67484
1Gibberella zeae	ABC86605
1Glomerella graminicola M1.001	EFQ24855
1Hordeum vulgare subsp. vulgare	CAA52407
1Isoetes engelmannii	ADT62136
1Isoetes engelmannii	ACK38311
1Kazachstania exigua	AF114954_1
1Kazachstania servazzii	AF114957_1
1Kazachstania unispora	AF114959_1
1Millerozyma farinosa	CBM41825
1Millerozyma farinosa	YP_003204921
1Nakaseomyces bacillisporus	CAX36943
1Nakaseomyces delphensis	CAX36928
1Naumovozyma castellii	AF437291_7
1Naumovozyma dairenensis	AF114952_1
1Ogataea angusta	YP_004072416
1Penicillium digitatum	YP_004221862
1Penicillium marneffei	NP_943712
1Phakopsora meibomiae	YP_003795684
1Phialocephala subalpina	YP_004733037
1Physarum polycephalum	ADZ99033
1Phytophthora megasperma	AAA32024
1Pneumocystis carinii	ACZ82954
1Pythium oligandrum	AAA70037
1Rhodotorula glutinis	BAF46417
1Saccharomyces arboricola	ADB25059
1Silene latifolia	ABH09173
1Silene uniflora	ABH09172
1Silene vulgaris	ABH09167
1Silene vulgaris	ABH09171
1Silene vulgaris	ABH09170
1Sporisorium reilianum SRZ2	CBQ72569
1Trametes cingulata	YP_003495097
1Triticum aestivum	AAB23976
1Ahrensia sp. R2A130	ZP_07373200
1Aspergillus niger CBS 513.88	XP_001402177
1Aspergillus oryzae RIB40	XP_001821129
1Endocarpon pusillum	AEH41535
1Podospora anserina	CAA42471
1Pyrenophora tritici-repentis Pt-1C-BFP	XP_001935361
1Litopenaeus vannamei	ABX56859
1Kazachstania barnettii	AF114943_1
1Naumovozyma castellii	AF114946_1
1Naumovozyma castellii	AF114948_1
1Naumovozyma castellii	AF114945_1
1Selaginella moellendorffii	AEA11203
1Ajellomyces dermatitidis SLH14081	XP_002620063
1Acetobacter pomorum DM001	ZP_08242374
1Acidiphilium multivorum AIU301	BAJ79838
1Anaplasma centrale str. Israel	ACZ48926
1Bartonella grahamii as4aup	ACS50771
1Glomerella graminicola M1.001	EFQ27529
1Glomerella graminicola M1.001	EFQ30735
1Gluconacetobacter sp. SXCC-1	ZP_08315338
1Gluconobacter oxydans 621H	AAW61908
1Hoeflea phototrophica DFL-43	ZP_02168086
1Ketogulonicigenium vulgare Y25	YP_003962585
1Loktanella vestfoldensis SKA53	ZP_01003337
1Manduca sexta	AF117583_1
1Oceanicaulis sp. HTCC2633	ZP_00957680
1Oceanicola granulosus HTCC2516	ZP_01157076
1Paulinella chromatophora	YP_002048861
1Pelagibaca bermudensis HTCC2601	ZP_01443107
1Plasmodium yoelii yoelii 17XNL	XP_726439
1Roseobacter litoralis Och 149	YP_004692365
1Roseovarius sp. 217	ZP_01037853
1Sulfitobacter sp. EE-36	ZP_00954038
1Homo sapiens	BAA02421
1Homo sapiens	BAA02420
1Rattus norvegicus	BAA02425
1Rattus norvegicus	BAA02426
1Arabidopsis thaliana	AEK01325
1Bambusa oldhamii	ABY55207
1Ostreococcus tauri	YP_717267
1Tilletia walkeri	YP_001876489
1Triticum aestivum	YP_398394
1Brassica napus	CBX48363
1Bradyrhizobium japonicum USDA 110	NP_767827
1Bartonella henselae str. Houston-1	YP_033251
1Bartonella tribocorum CIP 105476	YP_001609056
1Hyphomicrobium sp. MC1	YP_004677937
1Rhodospirillum centenum SW	YP_002296623
1Agrobacterium radiobacter K84	YP_002543572
1Agrobacterium tumefaciens F2	EGP59036
1Anaplasma marginale str. Florida	YP_002563927
1Anaplasma marginale str. St. Maries	YP_154219
1Anaplasma phagocytophilum HZ	YP_505725
1Bartonella bacilliformis KC583	YP_988696
1Beijerinckia indica subsp. indica ATCC 9039	YP_001833838
1Bradyrhizobium sp. BTAi1	YP_001237567
1Bradyrhizobium sp. BTAi1	YP_001237013
1Brucella pinnipedialis B2/94	YP_004755491
1Dinoroseobacter shibae DFL 12	YP_001534363
1Dinoroseobacter shibae DFL 12	YP_001531789
1Ehrlichia chaffeensis str. Arkansas	YP_507872
1Fulvimarina pelagi HTCC2506	ZP_01438197
1Labrenzia aggregata IAM 12614	ZP_01548187
1Neorickettsia risticii str. Illinois	YP_003081600
1Nitrobacter hamburgensis X14	YP_575628
1Novosphingobium nitrogenifigens DSM 19370	ZP_08209228
1Oceanibulbus indolifex HEL-45	ZP_02152109
1Phaeobacter gallaeciensis 2.10	ZP_02151171
1Phaeobacter gallaeciensis BS107	ZP_02145647
1Rhizobium etli 8C-3	ZP_03509480
1Rhizobium etli GR56	ZP_03520013
1Rhodobacter sphaeroides WS8N	EGJ22538
1Rhodobacter sphaeroides WS8N	ZP_08415688
1Rhodobacteraceae bacterium HTCC2150	ZP_01740791
1Rhodobacterales bacterium HTCC2255	ZP_01447575
1Rhodopseudomonas palustris TIE-1	YP_001989946
1Rhodopseudomonas palustris TIE-1	YP_001990082
1Rickettsia massiliae MTU5	YP_001498911
1Rickettsia rickettsii str. _Sheila Smith_	YP_001494138
1Rickettsia rickettsii str. Iowa	YP_001649373
1Roseobacter sp. SK209-2-6	ZP_01753760
1Roseovarius sp. TM1035	ZP_01878349
1Sagittula stellata E-37	ZP_01748173
1Sinorhizobium fredii NGR234	YP_002824997
1Rhodospirillum rubrum	ATPL_RHORU
1Gluconacetobacter diazotrophicus PAl 5	ATPL_GLUDA
1Rickettsia typhi str. Wilmington	ATPL_RICTY
1Rickettsia prowazekii str. Madrid E	ATPL_RICPR
1Rickettsia canadensis str. McKiel	ATPL_RICCK
1Wolbachia sp. wRi	ATPL_WOLWR
1Wolbachia endosymbiont strain TRS of Brugia malayi	ATPL_WOLTR
1Rickettsia akari str. Hartford	ATPL_RICAH
1Rickettsia felis URRWXCal2	ATPL_RICFE
1Rickettsia peacockii str. Rustic	ATPL_RICPU
1Rickettsia africae ESF-5	ATPL_RICAE
1Rickettsia bellii OSU 85-389	ATPL_RICB8
1Orientia tsutsugamushi str. Ikeda	ATPL_ORITI
1Granulibacter bethesdensis CGDNIH1	ATPL_GRABC
1Gluconobacter oxydans 621H	ATPL_GLUOX
1Magnetospirillum magneticum AMB-1	ATPL_MAGSA
1Rhodobacter capsulatus	ATPL_RHOCA
1Ruegeria pomeroyi DSS-3	ATPL_SILPO
1Ruegeria sp. TM1040	ATPL_SILST
1Hyphomonas neptunium ATCC 15444	ATPL_HYPNA
1Candidatus Pelagibacter ubique HTCC1062	ATPL_PELUB
1Azorhizobium caulinodans ORS 571	YP_001527177
1Candidatus Puniceispirillum marinum IMCC1322	YP_003551429
1Caulobacter crescentus NA1000	YP_002515747
1Chelativorans sp. BNC1	YP_673262
1Jannaschia sp. CCS1	YP_508710
1Mesorhizobium loti MAFF303099	NP_107734
1Paracoccus denitrificans PD1222	YP_916658
1Parvibaculum lavamentivorans DS-1	YP_001411976
1Rhizobium leguminosarum bv. trifolii WSM1325	YP_002974398
1Rhizobium leguminosarum bv. trifolii WSM2304	YP_002280036
1Rhodobacter sphaeroides ATCC 17029	YP_001044572
1Rickettsia heilongjiangensis 054	YP_004763743
1Sinorhizobium medicae WSM419	YP_001326140
